# Supplementary material
Source: publisher figshare collection journal article supplement (https://gsapubs.figshare.com/ndownloader/files/23300849)
Supplement: Supplementary file 1 [file 23300849]

## Sheet: All measurements
No.	Strike	Longitude	Latitude	Day	Month	Year	Geologist	Site
1	338.302	-70.0216	-20.179	12	7	14	Allmendinger	Site PI 50
2	156.212	-70.022	-20.1791	12	7	14	Allmendinger	Site PI 50
3	341.865	-70.0221	-20.1791	12	7	14	Allmendinger	Site PI 50
4	358.014	-70.0222	-20.1791	12	7	14	Allmendinger	Site PI 50
5	157.4	-70.0222	-20.1791	12	7	14	Allmendinger	Site PI 50
6	10.256	-70.0222	-20.179	12	7	14	Allmendinger	Site PI 50
7	325.334	-70.0224	-20.1791	12	7	14	Allmendinger	Site PI 50
8	331.133	-70.0224	-20.1791	12	7	14	Allmendinger	Site PI 50
9	327.374	-70.0225	-20.1791	12	7	14	Allmendinger	Site PI 50
10	155.975	-70.0219	-20.1811	12	7	14	Allmendinger	Site PI 50
11	153.825	-70.0221	-20.1813	12	7	14	Allmendinger	Site PI 50
12	146.754	-70.0222	-20.1814	12	7	14	Allmendinger	Site PI 50
13	166.777	-70.0223	-20.1814	12	7	14	Allmendinger	Site PI 50
14	163.77	-70.0223	-20.1814	12	7	14	Allmendinger	Site PI 50
15	168.49	-70.0222	-20.1816	12	7	14	Allmendinger	Site PI 50
16	166.759	-70.0223	-20.1817	12	7	14	Allmendinger	Site PI 50
17	155.244	-70.0225	-20.1816	12	7	14	Allmendinger	Site PI 50
18	149.219	-70.0225	-20.1817	12	7	14	Allmendinger	Site PI 50
19	170.248	-70.0223	-20.1853	12	7	14	Allmendinger	Site PI 50
20	161.32	-70.0222	-20.1854	12	7	14	Allmendinger	Site PI 50
21	5.68497	-70.0222	-20.1855	12	7	14	Allmendinger	Site PI 50
22	132.262	-70.0222	-20.1855	12	7	14	Allmendinger	Site PI 50
23	165.963	-70.0221	-20.1855	12	7	14	Allmendinger	Site PI 50
24	150.7	-70.022	-20.1855	12	7	14	Allmendinger	Site PI 50
25	73.889	-69.9974	-20.2868	11	7	14	Allmendinger	Site PI 49
26	97.315	-69.9973	-20.2862	11	7	14	Allmendinger	Site PI 49
27	25.4328	-69.9972	-20.2862	11	7	14	Allmendinger	Site PI 49
28	206.296	-69.9971	-20.2862	11	7	14	Allmendinger	Site PI 49
29	191.51	-69.9971	-20.2861	11	7	14	Allmendinger	Site PI 49
30	0.099113	-69.9969	-20.2861	11	7	14	Allmendinger	Site PI 49
31	47.8357	-69.9969	-20.286	11	7	14	Allmendinger	Site PI 49
32	22.8113	-69.9969	-20.286	11	7	14	Allmendinger	Site PI 49
33	345.692	-69.9969	-20.286	11	7	14	Allmendinger	Site PI 49
34	22.2753	-69.9968	-20.2859	11	7	14	Allmendinger	Site PI 49
35	25.387	-69.9968	-20.2859	11	7	14	Allmendinger	Site PI 49
36	74.1814	-69.9967	-20.2859	11	7	14	Allmendinger	Site PI 49
37	172.6	-70.0987	-20.3667	11	7	14	Allmendinger	Site PI 48
38	231.154	-70.0988	-20.3667	11	7	14	Allmendinger	Site PI 48
39	181.087	-70.0987	-20.3667	11	7	14	Allmendinger	Site PI 48
40	181.355	-70.0989	-20.3666	11	7	14	Allmendinger	Site PI 48
41	191.149	-70.099	-20.3666	11	7	14	Allmendinger	Site PI 48
42	189.482	-70.0991	-20.3666	11	7	14	Allmendinger	Site PI 48
43	180.956	-70.0992	-20.3665	11	7	14	Allmendinger	Site PI 48
44	138.187	-70.0993	-20.3665	11	7	14	Allmendinger	Site PI 48
45	340.817	-70.0993	-20.3665	11	7	14	Allmendinger	Site PI 48
46	196.496	-70.0995	-20.3665	11	7	14	Allmendinger	Site PI 48
47	216.472	-70.0995	-20.3666	11	7	14	Allmendinger	Site PI 48
48	344.905	-70.0996	-20.3666	11	7	14	Allmendinger	Site PI 48
49	346.6	-70.0996	-20.3666	11	7	14	Allmendinger	Site PI 48
50	164.033	-70.0996	-20.3666	11	7	14	Allmendinger	Site PI 48
51	147.074	-70.0996	-20.3667	11	7	14	Allmendinger	Site PI 48
52	172.9	-70.0998	-20.3667	11	7	14	Allmendinger	Site PI 48
53	148.726	-70.1	-20.3668	11	7	14	Allmendinger	Site PI 48
54	349.495	-70.1	-20.3668	11	7	14	Allmendinger	Site PI 48
55	219.936	-70.1001	-20.3668	11	7	14	Allmendinger	Site PI 48
56	144.481	-70.1001	-20.3668	11	7	14	Allmendinger	Site PI 48
57	317.709	-70.1001	-20.3668	11	7	14	Allmendinger	Site PI 48
58	187.026	-70.1001	-20.3669	11	7	14	Allmendinger	Site PI 48
59	219.96	-70.1002	-20.3673	11	7	14	Allmendinger	Site PI 48
60	165.236	-70.0995	-20.3673	11	7	14	Allmendinger	Site PI 48
61	167.036	-70.0995	-20.3672	11	7	14	Allmendinger	Site PI 48
62	158.297	-70.0994	-20.3673	11	7	14	Allmendinger	Site PI 48
63	163.309	-70.0995	-20.3674	11	7	14	Allmendinger	Site PI 48
64	179.26	-70.0996	-20.3674	11	7	14	Allmendinger	Site PI 48
65	169.59	-70.0996	-20.3675	11	7	14	Allmendinger	Site PI 48
66	149.881	-70.0995	-20.3676	11	7	14	Allmendinger	Site PI 48
67	356.833	-70.0994	-20.3676	11	7	14	Allmendinger	Site PI 48
68	343.049	-70.0994	-20.3676	11	7	14	Allmendinger	Site PI 48
69	359.591	-70.0994	-20.3676	11	7	14	Allmendinger	Site PI 48
70	352.425	-70.0994	-20.3676	11	7	14	Allmendinger	Site PI 48
71	349.739	-70.0994	-20.3676	11	7	14	Allmendinger	Site PI 48
72	341.377	-70.0993	-20.3675	11	7	14	Allmendinger	Site PI 48
73	316.3	-70.0994	-20.3676	11	7	14	Allmendinger	Site PI 48
74	197.983	-70.0568	-20.3499	11	7	14	Allmendinger	Site PI 47
75	201.576	-70.0567	-20.3499	11	7	14	Allmendinger	Site PI 47
76	214.292	-70.0561	-20.3495	11	7	14	Allmendinger	Site PI 47
77	186.446	-70.0559	-20.349	11	7	14	Allmendinger	Site PI 47
78	144.205	-70.0559	-20.349	11	7	14	Allmendinger	Site PI 47
79	213.415	-70.0558	-20.3482	11	7	14	Allmendinger	Site PI 47
80	217.064	-70.0559	-20.3481	11	7	14	Allmendinger	Site PI 47
81	200.001	-70.0561	-20.348	11	7	14	Allmendinger	Site PI 47
82	79.5453	-70.0561	-20.3481	11	7	14	Allmendinger	Site PI 47
83	7.3094	-70.0562	-20.3481	11	7	14	Allmendinger	Site PI 47
84	173.148	-70.0562	-20.3481	11	7	14	Allmendinger	Site PI 47
85	166.126	-70.0562	-20.3481	11	7	14	Allmendinger	Site PI 47
86	359.567	-70.0565	-20.348	11	7	14	Allmendinger	Site PI 47
87	195.858	-70.0566	-20.3481	11	7	14	Allmendinger	Site PI 47
88	173.883	-70.0566	-20.3481	11	7	14	Allmendinger	Site PI 47
89	256.861	-70.0567	-20.3481	11	7	14	Allmendinger	Site PI 47
90	241.905	-70.0571	-20.3482	11	7	14	Allmendinger	Site PI 47
91	210.493	-70.0571	-20.3483	11	7	14	Allmendinger	Site PI 47
92	209.802	-70.057	-20.3483	11	7	14	Allmendinger	Site PI 47
93	48.198	-70.0569	-20.3483	11	7	14	Allmendinger	Site PI 47
94	243.661	-70.0569	-20.3482	11	7	14	Allmendinger	Site PI 47
95	210.373	-70.0567	-20.3481	11	7	14	Allmendinger	Site PI 47
96	73.9817	-70.0567	-20.3481	11	7	14	Allmendinger	Site PI 47
97	173.524	-70.0566	-20.3482	11	7	14	Allmendinger	Site PI 47
98	187.699	-70.0566	-20.3482	11	7	14	Allmendinger	Site PI 47
99	184.389	-70.0565	-20.3483	11	7	14	Allmendinger	Site PI 47
100	178.799	-70.0565	-20.3485	11	7	14	Allmendinger	Site PI 47
101	190.837	-70.0565	-20.3485	11	7	14	Allmendinger	Site PI 47
102	45.3153	-70.0566	-20.3486	11	7	14	Allmendinger	Site PI 47
103	192.265	-70.0566	-20.3487	11	7	14	Allmendinger	Site PI 47
104	178.982	-70.0566	-20.3487	11	7	14	Allmendinger	Site PI 47
105	199.153	-70.0568	-20.3491	11	7	14	Allmendinger	Site PI 47
106	193.88	-70.0569	-20.3493	11	7	14	Allmendinger	Site PI 47
107	187.169	-70.0569	-20.3495	11	7	14	Allmendinger	Site PI 47
108	12.5984	-70.0568	-20.349	11	7	14	Allmendinger	Site PI 47
109	24.5464	-70.0568	-20.349	11	7	14	Allmendinger	Site PI 47
110	20.3755	-70.0568	-20.349	11	7	14	Allmendinger	Site PI 47
111	3.49066	-70.0568	-20.349	11	7	14	Allmendinger	Site PI 47
112	204.267	-70.0566	-20.3491	11	7	14	Allmendinger	Site PI 47
113	185.173	-70.0566	-20.3491	11	7	14	Allmendinger	Site PI 47
114	202.261	-70.0567	-20.3495	11	7	14	Allmendinger	Site PI 47
115	175.306	-70.0567	-20.3495	11	7	14	Allmendinger	Site PI 47
116	183.695	-70.0567	-20.3498	11	7	14	Allmendinger	Site PI 47
117	197.063	-70.0567	-20.3495	11	7	14	Allmendinger	Site PI 47
118	185.069	-70.0566	-20.3495	11	7	14	Allmendinger	Site PI 47
119	184.967	-70.0566	-20.3495	11	7	14	Allmendinger	Site PI 47
120	193.013	-70.0567	-20.3495	11	7	14	Allmendinger	Site PI 47
121	326.928	-70.0415	-20.5069	11	7	14	Allmendinger	Site PI 46
122	130.321	-70.0417	-20.5069	11	7	14	Allmendinger	Site PI 46
123	330.299	-70.0418	-20.5069	11	7	14	Allmendinger	Site PI 46
124	156.03	-70.0418	-20.5069	11	7	14	Allmendinger	Site PI 46
125	63.8771	-70.042	-20.5072	11	7	14	Allmendinger	Site PI 46
126	279.027	-70.0421	-20.5074	11	7	14	Allmendinger	Site PI 46
127	259.399	-70.042	-20.5074	11	7	14	Allmendinger	Site PI 46
128	92.6452	-70.042	-20.5075	11	7	14	Allmendinger	Site PI 46
129	112.02	-70.042	-20.5075	11	7	14	Allmendinger	Site PI 46
130	131.594	-70.0419	-20.5076	11	7	14	Allmendinger	Site PI 46
131	88.1516	-70.0418	-20.5076	11	7	14	Allmendinger	Site PI 46
132	121.74	-70.0418	-20.5076	11	7	14	Allmendinger	Site PI 46
133	334.753	-70.0418	-20.5076	11	7	14	Allmendinger	Site PI 46
134	313.053	-70.0418	-20.5076	11	7	14	Allmendinger	Site PI 46
135	12.4882	-70.0417	-20.5076	11	7	14	Allmendinger	Site PI 46
136	341.423	-70.0417	-20.5076	11	7	14	Allmendinger	Site PI 46
137	347.545	-70.0417	-20.5076	11	7	14	Allmendinger	Site PI 46
138	100.579	-70.0417	-20.5076	11	7	14	Allmendinger	Site PI 46
139	146.595	-70.0417	-20.5076	11	7	14	Allmendinger	Site PI 46
140	81.5369	-70.0417	-20.5076	11	7	14	Allmendinger	Site PI 46
141	95.6186	-70.0416	-20.5076	11	7	14	Allmendinger	Site PI 46
142	170.669	-70.0416	-20.5077	11	7	14	Allmendinger	Site PI 46
143	156.867	-70.0416	-20.5077	11	7	14	Allmendinger	Site PI 46
144	142.6	-70.0415	-20.5077	11	7	14	Allmendinger	Site PI 46
145	148.949	-70.0414	-20.5078	11	7	14	Allmendinger	Site PI 46
146	339.475	-70.0414	-20.5078	11	7	14	Allmendinger	Site PI 46
147	327.881	-70.0413	-20.5078	11	7	14	Allmendinger	Site PI 46
148	2.30293	-70.0412	-20.5078	11	7	14	Allmendinger	Site PI 46
149	350.829	-70.0412	-20.5077	11	7	14	Allmendinger	Site PI 46
150	150.798	-70.0412	-20.5077	11	7	14	Allmendinger	Site PI 46
151	160.499	-70.0412	-20.5077	11	7	14	Allmendinger	Site PI 46
152	256.204	-70.0412	-20.5077	11	7	14	Allmendinger	Site PI 46
153	81.4197	-70.0412	-20.5077	11	7	14	Allmendinger	Site PI 46
154	168.537	-70.0411	-20.5077	11	7	14	Allmendinger	Site PI 46
155	148.132	-70.0409	-20.508	11	7	14	Allmendinger	Site PI 46
156	146.659	-70.0408	-20.5082	11	7	14	Allmendinger	Site PI 46
157	333.483	-70.0408	-20.5083	11	7	14	Allmendinger	Site PI 46
158	135.013	-70.0408	-20.5083	11	7	14	Allmendinger	Site PI 46
159	144.586	-70.0409	-20.5083	11	7	14	Allmendinger	Site PI 46
160	150.656	-70.0409	-20.5084	11	7	14	Allmendinger	Site PI 46
161	348.591	-70.0409	-20.5084	11	7	14	Allmendinger	Site PI 46
162	139.262	-70.0409	-20.5084	11	7	14	Allmendinger	Site PI 46
163	115.315	-70.0045	-20.5415	11	7	14	Allmendinger	Site PI 44
164	147.591	-70.0041	-20.5418	11	7	14	Allmendinger	Site PI 44
165	121.54	-70.0041	-20.5418	11	7	14	Allmendinger	Site PI 44
166	118.932	-70.0038	-20.5419	11	7	14	Allmendinger	Site PI 44
167	266.097	-70.0028	-20.5414	11	7	14	Allmendinger	Site PI 44
168	332.289	-70.0028	-20.5414	11	7	14	Allmendinger	Site PI 44
169	327.549	-70.003	-20.5414	11	7	14	Allmendinger	Site PI 44
170	331.966	-70.003	-20.5414	11	7	14	Allmendinger	Site PI 44
171	164.61	-70.003	-20.5409	11	7	14	Allmendinger	Site PI 44
172	94.8695	-70.003	-20.5409	11	7	14	Allmendinger	Site PI 44
173	1.22622	-70.0029	-20.5407	11	7	14	Allmendinger	Site PI 44
174	358.915	-70.003	-20.5407	11	7	14	Allmendinger	Site PI 44
175	293.182	-70.003	-20.5405	11	7	14	Allmendinger	Site PI 44
176	334.962	-70.0032	-20.5405	11	7	14	Allmendinger	Site PI 44
177	335.792	-70.0035	-20.5404	11	7	14	Allmendinger	Site PI 44
178	325.4	-70.0035	-20.5402	11	7	14	Allmendinger	Site PI 44
179	138.288	-70.0035	-20.54	11	7	14	Allmendinger	Site PI 44
180	319.188	-70.0035	-20.54	11	7	14	Allmendinger	Site PI 44
181	307.914	-70.0035	-20.54	11	7	14	Allmendinger	Site PI 44
182	112.554	-70.0035	-20.5401	11	7	14	Allmendinger	Site PI 44
183	324.359	-70.0036	-20.5401	11	7	14	Allmendinger	Site PI 44
184	311.058	-70.0039	-20.5402	11	7	14	Allmendinger	Site PI 44
185	313.52	-70.0039	-20.5402	11	7	14	Allmendinger	Site PI 44
186	312.279	-70.004	-20.5401	11	7	14	Allmendinger	Site PI 44
187	337.09	-70.0041	-20.5401	11	7	14	Allmendinger	Site PI 44
188	335.362	-70.0041	-20.5401	11	7	14	Allmendinger	Site PI 44
189	145.851	-70.0041	-20.5401	11	7	14	Allmendinger	Site PI 44
190	326.319	-70.0042	-20.54	11	7	14	Allmendinger	Site PI 44
191	302.824	-70.0043	-20.54	11	7	14	Allmendinger	Site PI 44
192	306.856	-70.0044	-20.54	11	7	14	Allmendinger	Site PI 44
193	124.794	-70.0045	-20.5399	11	7	14	Allmendinger	Site PI 44
194	295.685	-70.0045	-20.5398	11	7	14	Allmendinger	Site PI 44
195	106.919	-70.0044	-20.5399	11	7	14	Allmendinger	Site PI 44
196	319.505	-70.0045	-20.5396	11	7	14	Allmendinger	Site PI 44
197	306.991	-70.0045	-20.5396	11	7	14	Allmendinger	Site PI 44
198	137.085	-70.0045	-20.5396	11	7	14	Allmendinger	Site PI 44
199	135.748	-70.0045	-20.5396	11	7	14	Allmendinger	Site PI 44
200	126.568	-70.0045	-20.5396	11	7	14	Allmendinger	Site PI 44
201	300.672	-70.0045	-20.5396	11	7	14	Allmendinger	Site PI 44
202	330.423	-70.0046	-20.5396	11	7	14	Allmendinger	Site PI 44
203	143.828	-70.0045	-20.5394	11	7	14	Allmendinger	Site PI 44
204	323.93	-70.0045	-20.5393	11	7	14	Allmendinger	Site PI 44
205	327.964	-70.0045	-20.5393	11	7	14	Allmendinger	Site PI 44
206	322.464	-70.0045	-20.5394	11	7	14	Allmendinger	Site PI 44
207	324.819	-70.0046	-20.5394	11	7	14	Allmendinger	Site PI 44
208	134.457	-70.0046	-20.5394	11	7	14	Allmendinger	Site PI 44
209	146.615	-70.0046	-20.5395	11	7	14	Allmendinger	Site PI 44
210	328.281	-70.0047	-20.5394	11	7	14	Allmendinger	Site PI 44
211	322.659	-70.0047	-20.5395	11	7	14	Allmendinger	Site PI 44
212	262.849	-69.9294	-20.1612	10	7	14	Allmendinger	Site PI 43
213	73.6702	-69.9289	-20.1606	10	7	14	Allmendinger	Site PI 43
214	103.628	-69.9289	-20.1607	10	7	14	Allmendinger	Site PI 43
215	84.6496	-69.9288	-20.1608	10	7	14	Allmendinger	Site PI 43
216	321.491	-69.9291	-20.1611	10	7	14	Allmendinger	Site PI 43
217	192.749	-69.9288	-20.1619	10	7	14	Allmendinger	Site PI 43
218	54.459	-69.9287	-20.162	10	7	14	Allmendinger	Site PI 43
219	249.79	-69.929	-20.162	10	7	14	Allmendinger	Site PI 43
220	249.645	-69.9291	-20.162	10	7	14	Allmendinger	Site PI 43
221	157.764	-69.9318	-20.0864	10	7	14	Allmendinger	Site PI 42
222	5.07794	-69.9317	-20.0864	10	7	14	Allmendinger	Site PI 42
223	314.411	-69.9317	-20.0864	10	7	14	Allmendinger	Site PI 42
224	29.2213	-69.9316	-20.0864	10	7	14	Allmendinger	Site PI 42
225	203.274	-69.9315	-20.0864	10	7	14	Allmendinger	Site PI 42
226	198.504	-69.9316	-20.0864	10	7	14	Allmendinger	Site PI 42
227	11.824	-69.9316	-20.0864	10	7	14	Allmendinger	Site PI 42
228	264.323	-69.9317	-20.0863	10	7	14	Allmendinger	Site PI 42
229	20.6181	-69.9317	-20.0863	10	7	14	Allmendinger	Site PI 42
230	205.244	-69.9317	-20.0863	10	7	14	Allmendinger	Site PI 42
231	328.357	-69.9317	-20.0862	10	7	14	Allmendinger	Site PI 42
232	12.49	-69.9317	-20.0862	10	7	14	Allmendinger	Site PI 42
233	233.2	-69.9317	-20.0862	10	7	14	Allmendinger	Site PI 42
234	136.113	-69.9318	-20.0861	10	7	14	Allmendinger	Site PI 42
235	176.405	-69.9318	-20.0861	10	7	14	Allmendinger	Site PI 42
236	21.1142	-69.9318	-20.0861	10	7	14	Allmendinger	Site PI 42
237	124.296	-69.9317	-20.0859	10	7	14	Allmendinger	Site PI 42
238	160.549	-69.9317	-20.0859	10	7	14	Allmendinger	Site PI 42
239	213.059	-69.9317	-20.086	10	7	14	Allmendinger	Site PI 42
240	1.08093	-69.9317	-20.086	10	7	14	Allmendinger	Site PI 42
241	24.2959	-69.9316	-20.086	10	7	14	Allmendinger	Site PI 42
242	134.19	-69.9314	-20.0861	10	7	14	Allmendinger	Site PI 42
243	2.64607	-69.9315	-20.0862	10	7	14	Allmendinger	Site PI 42
244	285.968	-69.9315	-20.0861	10	7	14	Allmendinger	Site PI 42
245	329.742	-69.9315	-20.0862	10	7	14	Allmendinger	Site PI 42
246	28.0863	-69.9315	-20.0862	10	7	14	Allmendinger	Site PI 42
247	323.491	-69.9314	-20.0863	10	7	14	Allmendinger	Site PI 42
248	227.846	-69.9314	-20.0863	10	7	14	Allmendinger	Site PI 42
249	208.823	-69.9313	-20.0863	10	7	14	Allmendinger	Site PI 42
250	211.391	-69.9313	-20.0863	10	7	14	Allmendinger	Site PI 42
251	206.121	-69.9313	-20.0863	10	7	14	Allmendinger	Site PI 42
252	197.932	-69.9312	-20.0864	10	7	14	Allmendinger	Site PI 42
253	110.86	-69.9312	-20.0864	10	7	14	Allmendinger	Site PI 42
254	289.01	-69.9313	-20.0865	10	7	14	Allmendinger	Site PI 42
255	213.965	-69.9313	-20.0865	10	7	14	Allmendinger	Site PI 42
256	156.175	-69.9314	-20.0865	10	7	14	Allmendinger	Site PI 42
257	180.713	-69.9313	-20.0866	10	7	14	Allmendinger	Site PI 42
258	312.731	-69.9313	-20.0867	10	7	14	Allmendinger	Site PI 42
259	148.649	-69.9313	-20.0867	10	7	14	Allmendinger	Site PI 42
260	188.672	-69.9314	-20.0867	10	7	14	Allmendinger	Site PI 42
261	309.601	-69.9314	-20.0867	10	7	14	Allmendinger	Site PI 42
262	159.698	-69.9314	-20.0867	10	7	14	Allmendinger	Site PI 42
263	130.098	-69.9315	-20.0867	10	7	14	Allmendinger	Site PI 42
264	170.49	-69.9315	-20.0867	10	7	14	Allmendinger	Site PI 42
265	322.46	-69.9315	-20.0867	10	7	14	Allmendinger	Site PI 42
266	137.871	-69.9315	-20.0867	10	7	14	Allmendinger	Site PI 42
267	130.637	-69.9315	-20.0868	10	7	14	Allmendinger	Site PI 42
268	315.539	-69.9315	-20.0868	10	7	14	Allmendinger	Site PI 42
269	317.886	-69.9316	-20.0868	10	7	14	Allmendinger	Site PI 42
270	319.875	-69.9316	-20.0868	10	7	14	Allmendinger	Site PI 42
271	1.61166	-69.9872	-20.0953	10	7	14	Allmendinger	Site PI 41
272	113.203	-69.9874	-20.0952	10	7	14	Allmendinger	Site PI 41
273	328.693	-69.9874	-20.0949	10	7	14	Allmendinger	Site PI 41
274	65.7759	-69.9874	-20.0949	10	7	14	Allmendinger	Site PI 41
275	324.783	-69.9874	-20.0949	10	7	14	Allmendinger	Site PI 41
276	125.103	-69.9874	-20.0947	10	7	14	Allmendinger	Site PI 41
277	66.2698	-69.9874	-20.0945	10	7	14	Allmendinger	Site PI 41
278	97.4658	-69.9873	-20.0945	10	7	14	Allmendinger	Site PI 41
279	281.208	-69.9874	-20.0944	10	7	14	Allmendinger	Site PI 41
280	313.774	-69.9877	-20.0942	10	7	14	Allmendinger	Site PI 41
281	342.662	-69.9877	-20.0942	10	7	14	Allmendinger	Site PI 41
282	296.683	-69.9878	-20.0942	10	7	14	Allmendinger	Site PI 41
283	4.02383	-69.9878	-20.0943	10	7	14	Allmendinger	Site PI 41
284	285.886	-69.988	-20.0943	10	7	14	Allmendinger	Site PI 41
285	103.436	-69.988	-20.0944	10	7	14	Allmendinger	Site PI 41
286	277.927	-69.988	-20.0945	10	7	14	Allmendinger	Site PI 41
287	100.731	-69.988	-20.0946	10	7	14	Allmendinger	Site PI 41
288	78.9415	-69.988	-20.0946	10	7	14	Allmendinger	Site PI 41
289	272.311	-69.988	-20.0946	10	7	14	Allmendinger	Site PI 41
290	276.159	-69.988	-20.0947	10	7	14	Allmendinger	Site PI 41
291	92.2695	-69.988	-20.0947	10	7	14	Allmendinger	Site PI 41
292	69.4818	-69.9881	-20.0947	10	7	14	Allmendinger	Site PI 41
293	206.602	-69.9881	-20.0948	10	7	14	Allmendinger	Site PI 41
294	98.6169	-69.9881	-20.0948	10	7	14	Allmendinger	Site PI 41
295	202.109	-69.9881	-20.0949	10	7	14	Allmendinger	Site PI 41
296	247.406	-69.9881	-20.0949	10	7	14	Allmendinger	Site PI 41
297	29.4847	-69.9881	-20.0949	10	7	14	Allmendinger	Site PI 41
298	315.264	-69.9882	-20.095	10	7	14	Allmendinger	Site PI 41
299	359.91	-69.9882	-20.095	10	7	14	Allmendinger	Site PI 41
300	93.1134	-69.9882	-20.095	10	7	14	Allmendinger	Site PI 41
301	261.338	-69.9882	-20.0951	10	7	14	Allmendinger	Site PI 41
302	92.2422	-69.9882	-20.0951	10	7	14	Allmendinger	Site PI 41
303	289.305	-69.9882	-20.0951	10	7	14	Allmendinger	Site PI 41
304	172.189	-70.0204	-20.0868	10	7	14	Allmendinger	Site PI 40
305	167.308	-70.0206	-20.0867	10	7	14	Allmendinger	Site PI 40
306	161.683	-70.0208	-20.0866	10	7	14	Allmendinger	Site PI 40
307	84.7531	-70.0207	-20.0866	10	7	14	Allmendinger	Site PI 40
308	85.172	-70.021	-20.0867	10	7	14	Allmendinger	Site PI 40
309	184.522	-70.021	-20.0867	10	7	14	Allmendinger	Site PI 40
310	173.517	-70.0212	-20.0867	10	7	14	Allmendinger	Site PI 40
311	86.0716	-70.0212	-20.0867	10	7	14	Allmendinger	Site PI 40
312	174.903	-70.0217	-20.0868	10	7	14	Allmendinger	Site PI 40
313	330.585	-70.0218	-20.0869	10	7	14	Allmendinger	Site PI 40
314	267.544	-70.0219	-20.0869	10	7	14	Allmendinger	Site PI 40
315	165.297	-70.0219	-20.0869	10	7	14	Allmendinger	Site PI 40
316	186.094	-70.0221	-20.087	10	7	14	Allmendinger	Site PI 40
317	273.875	-70.0222	-20.087	10	7	14	Allmendinger	Site PI 40
318	259.579	-70.0222	-20.087	10	7	14	Allmendinger	Site PI 40
319	271.937	-70.0224	-20.0869	10	7	14	Allmendinger	Site PI 40
320	253.899	-70.0224	-20.0871	10	7	14	Allmendinger	Site PI 40
321	288.932	-70.0232	-20.0872	10	7	14	Allmendinger	Site PI 40
322	171.626	-70.0232	-20.0872	10	7	14	Allmendinger	Site PI 40
323	249.161	-70.0231	-20.087	10	7	14	Allmendinger	Site PI 40
324	332.049	-70.0231	-20.087	10	7	14	Allmendinger	Site PI 40
325	130.326	-70.023	-20.087	10	7	14	Allmendinger	Site PI 40
326	72.7376	-70.023	-20.087	10	7	14	Allmendinger	Site PI 40
327	140.516	-70.0228	-20.0871	10	7	14	Allmendinger	Site PI 40
328	90.0516	-70.0227	-20.0871	10	7	14	Allmendinger	Site PI 40
329	350.799	-70.0225	-20.0871	10	7	14	Allmendinger	Site PI 40
330	201.041	-70.0396	-20.0552	10	7	14	Allmendinger	Site PI 39
331	185.743	-70.0396	-20.0554	10	7	14	Allmendinger	Site PI 39
332	178.657	-70.0399	-20.0554	10	7	14	Allmendinger	Site PI 39
333	166.794	-70.0406	-20.0556	10	7	14	Allmendinger	Site PI 39
334	344.264	-70.0405	-20.0564	10	7	14	Allmendinger	Site PI 39
335	186.858	-70.0405	-20.0564	10	7	14	Allmendinger	Site PI 39
336	155.314	-70.0405	-20.0564	10	7	14	Allmendinger	Site PI 39
337	121.76	-70.0401	-20.0561	10	7	14	Allmendinger	Site PI 39
338	138.832	-70.0401	-20.0561	10	7	14	Allmendinger	Site PI 39
339	128.873	-70.0401	-20.0558	10	7	14	Allmendinger	Site PI 39
340	189.736	-70.0402	-20.0556	10	7	14	Allmendinger	Site PI 39
341	199.287	-70.0403	-20.0553	10	7	14	Allmendinger	Site PI 39
342	191.376	-70.0405	-20.0551	10	7	14	Allmendinger	Site PI 39
343	186.152	-70.0408	-20.055	10	7	14	Allmendinger	Site PI 39
344	203.882	-70.0409	-20.0551	10	7	14	Allmendinger	Site PI 39
345	343.882	-70.041	-20.0549	10	7	14	Allmendinger	Site PI 39
346	185.09	-70.0409	-20.0544	10	7	14	Allmendinger	Site PI 39
347	15.9181	-70.0408	-20.0542	10	7	14	Allmendinger	Site PI 39
348	159.716	-70.0411	-20.0538	10	7	14	Allmendinger	Site PI 39
349	299.789	-70.0412	-20.0538	10	7	14	Allmendinger	Site PI 39
350	193.153	-70.041	-20.0542	10	7	14	Allmendinger	Site PI 39
351	188.017	-70.0407	-20.0543	10	7	14	Allmendinger	Site PI 39
352	215.987	-70.0406	-20.0544	10	7	14	Allmendinger	Site PI 39
353	180.706	-70.0404	-20.0546	10	7	14	Allmendinger	Site PI 39
354	205.083	-70.04	-20.0547	10	7	14	Allmendinger	Site PI 39
355	177.998	-70.0399	-20.0547	10	7	14	Allmendinger	Site PI 39
356	208.742	-70.0401	-20.0547	10	7	14	Allmendinger	Site PI 39
357	215.843	-70.0198	-20.0234	10	7	14	Allmendinger	Site PI 38
358	5.86959	-70.0199	-20.0234	10	7	14	Allmendinger	Site PI 38
359	4.40572	-70.02	-20.0234	10	7	14	Allmendinger	Site PI 38
360	355.707	-70.02	-20.0234	10	7	14	Allmendinger	Site PI 38
361	5.64514	-70.02	-20.0234	10	7	14	Allmendinger	Site PI 38
362	131.182	-70.0199	-20.0233	10	7	14	Allmendinger	Site PI 38
363	8.66479	-70.02	-20.0232	10	7	14	Allmendinger	Site PI 38
364	9.51334	-70.02	-20.0232	10	7	14	Allmendinger	Site PI 38
365	19.3082	-70.02	-20.0232	10	7	14	Allmendinger	Site PI 38
366	14.8179	-70.02	-20.0232	10	7	14	Allmendinger	Site PI 38
367	15.4294	-70.02	-20.0232	10	7	14	Allmendinger	Site PI 38
368	5.79941	-70.02	-20.0231	10	7	14	Allmendinger	Site PI 38
369	18.4992	-70.0199	-20.023	10	7	14	Allmendinger	Site PI 38
370	25.4122	-70.0199	-20.023	10	7	14	Allmendinger	Site PI 38
371	196.199	-70.0199	-20.023	10	7	14	Allmendinger	Site PI 38
372	359.834	-70.0199	-20.0229	10	7	14	Allmendinger	Site PI 38
373	7.97136	-70.0199	-20.0229	10	7	14	Allmendinger	Site PI 38
374	29.822	-70.0199	-20.0228	10	7	14	Allmendinger	Site PI 38
375	22.6557	-70.0198	-20.0227	10	7	14	Allmendinger	Site PI 38
376	33.1825	-70.0199	-20.0225	10	7	14	Allmendinger	Site PI 38
377	198.106	-70.0197	-20.0225	10	7	14	Allmendinger	Site PI 38
378	30.3927	-70.0197	-20.0225	10	7	14	Allmendinger	Site PI 38
379	34.5106	-70.0197	-20.0224	10	7	14	Allmendinger	Site PI 38
380	198.181	-70.0196	-20.0225	10	7	14	Allmendinger	Site PI 38
381	178.206	-70.0191	-20.0212	10	7	14	Allmendinger	Site PI 38
382	25.7978	-70.0192	-20.0214	10	7	14	Allmendinger	Site PI 38
383	226.562	-70.0193	-20.0214	10	7	14	Allmendinger	Site PI 38
384	205.17	-70.0196	-20.0213	10	7	14	Allmendinger	Site PI 38
385	190.317	-70.0196	-20.0215	10	7	14	Allmendinger	Site PI 38
386	203.121	-70.0195	-20.0218	10	7	14	Allmendinger	Site PI 38
387	208.638	-70.0195	-20.0218	10	7	14	Allmendinger	Site PI 38
388	205.891	-70.0195	-20.0218	10	7	14	Allmendinger	Site PI 38
389	33.8785	-70.0196	-20.0219	10	7	14	Allmendinger	Site PI 38
390	195.109	-70.0196	-20.0219	10	7	14	Allmendinger	Site PI 38
391	208.891	-70.0196	-20.022	10	7	14	Allmendinger	Site PI 38
392	214.508	-70.0197	-20.0219	10	7	14	Allmendinger	Site PI 38
393	206.035	-70.0197	-20.022	10	7	14	Allmendinger	Site PI 38
394	214.574	-70.0198	-20.0221	10	7	14	Allmendinger	Site PI 38
395	194.77	-70.0198	-20.0221	10	7	14	Allmendinger	Site PI 38
396	186.038	-70.0199	-20.0222	10	7	14	Allmendinger	Site PI 38
397	208.2	-70.0199	-20.0223	10	7	14	Allmendinger	Site PI 38
398	195.779	-70.0198	-20.0223	10	7	14	Allmendinger	Site PI 38
399	201.883	-70.0198	-20.0223	10	7	14	Allmendinger	Site PI 38
400	174.262	-70.0198	-20.0223	10	7	14	Allmendinger	Site PI 38
401	211.629	-70.0197	-20.0223	10	7	14	Allmendinger	Site PI 38
402	199.305	-70.0197	-20.0224	10	7	14	Allmendinger	Site PI 38
403	121.563	-70.0096	-20.0108	10	7	14	Allmendinger	Site PI 37
404	154.63	-70.0093	-20.0105	10	7	14	Allmendinger	Site PI 37
405	185.311	-70.0093	-20.0105	10	7	14	Allmendinger	Site PI 37
406	204.291	-70.0096	-20.0111	10	7	14	Allmendinger	Site PI 37
407	41.4438	-70.0096	-20.0111	10	7	14	Allmendinger	Site PI 37
408	148.49	-70.0096	-20.0111	10	7	14	Allmendinger	Site PI 37
409	139.868	-70.0096	-20.0111	10	7	14	Allmendinger	Site PI 37
410	214.885	-70.0096	-20.0112	10	7	14	Allmendinger	Site PI 37
411	205.77	-70.0096	-20.0112	10	7	14	Allmendinger	Site PI 37
412	176.823	-70.0095	-20.0113	10	7	14	Allmendinger	Site PI 37
413	225.926	-70.0096	-20.0113	10	7	14	Allmendinger	Site PI 37
414	181.202	-70.0096	-20.0114	10	7	14	Allmendinger	Site PI 37
415	179.06	-70.0096	-20.0115	10	7	14	Allmendinger	Site PI 37
416	34.6488	-70.0096	-20.0115	10	7	14	Allmendinger	Site PI 37
417	211.849	-70.0097	-20.0115	10	7	14	Allmendinger	Site PI 37
418	212.595	-70.0098	-20.0115	10	7	14	Allmendinger	Site PI 37
419	150.194	-70.0098	-20.0115	10	7	14	Allmendinger	Site PI 37
420	225.784	-70.0098	-20.0115	10	7	14	Allmendinger	Site PI 37
421	132.027	-70.0098	-20.0115	10	7	14	Allmendinger	Site PI 37
422	219.446	-70.0097	-20.0115	10	7	14	Allmendinger	Site PI 37
423	151.824	-70.0099	-20.0117	10	7	14	Allmendinger	Site PI 37
424	194.354	-70.0099	-20.0117	10	7	14	Allmendinger	Site PI 37
425	262.334	-70.0099	-20.0117	10	7	14	Allmendinger	Site PI 37
426	204.432	-70.01	-20.0117	10	7	14	Allmendinger	Site PI 37
427	306.608	-70.01	-20.0117	10	7	14	Allmendinger	Site PI 37
428	29.8191	-70.0101	-20.0118	10	7	14	Allmendinger	Site PI 37
429	130.976	-70.0101	-20.0119	10	7	14	Allmendinger	Site PI 37
430	218.76	-70.0101	-20.012	10	7	14	Allmendinger	Site PI 37
431	193.977	-70.01	-20.0119	10	7	14	Allmendinger	Site PI 37
432	22.573	-70.0101	-20.0119	10	7	14	Allmendinger	Site PI 37
433	14.8735	-70.0101	-20.0119	10	7	14	Allmendinger	Site PI 37
434	19.0772	-70.01	-20.0118	10	7	14	Allmendinger	Site PI 37
435	128.903	-70.01	-20.0117	10	7	14	Allmendinger	Site PI 37
436	14.2989	-70.01	-20.0117	10	7	14	Allmendinger	Site PI 37
437	200.056	-70.0101	-20.0116	10	7	14	Allmendinger	Site PI 37
438	199.523	-70.01	-20.0115	10	7	14	Allmendinger	Site PI 37
439	193.894	-70.0099	-20.0114	10	7	14	Allmendinger	Site PI 37
440	195.572	-70.01	-20.0114	10	7	14	Allmendinger	Site PI 37
441	196.754	-70.0368	-19.9719	9	7	14	Allmendinger	Site PI 36
442	61.6123	-70.0367	-19.9724	9	7	14	Allmendinger	Site PI 36
443	18.5923	-70.0367	-19.9724	9	7	14	Allmendinger	Site PI 36
444	47.1542	-70.0366	-19.9724	9	7	14	Allmendinger	Site PI 36
445	38.3008	-70.0366	-19.9724	9	7	14	Allmendinger	Site PI 36
446	32.8111	-70.0366	-19.9723	9	7	14	Allmendinger	Site PI 36
447	223.04	-70.0365	-19.9723	9	7	14	Allmendinger	Site PI 36
448	232.831	-70.0364	-19.9722	9	7	14	Allmendinger	Site PI 36
449	44.0215	-70.0363	-19.9721	9	7	14	Allmendinger	Site PI 36
450	17.0803	-70.0363	-19.9721	9	7	14	Allmendinger	Site PI 36
451	0.965126	-70.0363	-19.972	9	7	14	Allmendinger	Site PI 36
452	200.013	-70.0363	-19.972	9	7	14	Allmendinger	Site PI 36
453	234.506	-70.0363	-19.972	9	7	14	Allmendinger	Site PI 36
454	32.4654	-70.0361	-19.972	9	7	14	Allmendinger	Site PI 36
455	28.678	-70.0357	-19.9722	9	7	14	Allmendinger	Site PI 36
456	9.42159	-70.0357	-19.9722	9	7	14	Allmendinger	Site PI 36
457	26.9781	-70.0356	-19.9718	9	7	14	Allmendinger	Site PI 36
458	217.529	-70.0356	-19.9718	9	7	14	Allmendinger	Site PI 36
459	7.59614	-70.0354	-19.9716	9	7	14	Allmendinger	Site PI 36
460	4.7327	-70.0353	-19.9715	9	7	14	Allmendinger	Site PI 36
461	347.051	-70.035	-19.9713	9	7	14	Allmendinger	Site PI 36
462	341.042	-70.0346	-19.971	9	7	14	Allmendinger	Site PI 36
463	0.475052	-70.0349	-19.9706	9	7	14	Allmendinger	Site PI 36
464	199.021	-70.035	-19.9708	9	7	14	Allmendinger	Site PI 36
465	353.354	-70.0352	-19.9708	9	7	14	Allmendinger	Site PI 36
466	215.487	-70.0354	-19.971	9	7	14	Allmendinger	Site PI 36
467	8.83543	-70.0357	-19.9712	9	7	14	Allmendinger	Site PI 36
468	188.988	-70.0358	-19.9712	9	7	14	Allmendinger	Site PI 36
469	205.32	-70.036	-19.9712	9	7	14	Allmendinger	Site PI 36
470	165.721	-70.0361	-19.9714	9	7	14	Allmendinger	Site PI 36
471	16.156	-70.0366	-19.9716	9	7	14	Allmendinger	Site PI 36
472	353.393	-70.0359	-19.9665	9	7	14	Allmendinger	Site PI 36
473	180.395	-70.036	-19.9665	9	7	14	Allmendinger	Site PI 36
474	197.238	-70.0361	-19.9664	9	7	14	Allmendinger	Site PI 36
475	0.873413	-70.0362	-19.9663	9	7	14	Allmendinger	Site PI 36
476	28.8753	-70.0363	-19.9663	9	7	14	Allmendinger	Site PI 36
477	14.3943	-70.0363	-19.9662	9	7	14	Allmendinger	Site PI 36
478	181.965	-70.0365	-19.9661	9	7	14	Allmendinger	Site PI 36
479	181.381	-70.0366	-19.9661	9	7	14	Allmendinger	Site PI 36
480	181.297	-70.0367	-19.9661	9	7	14	Allmendinger	Site PI 36
481	192.773	-70.0368	-19.966	9	7	14	Allmendinger	Site PI 36
482	205.137	-70.0369	-19.966	9	7	14	Allmendinger	Site PI 36
483	183.335	-70.0369	-19.9661	9	7	14	Allmendinger	Site PI 36
484	188.799	-70.0372	-19.966	9	7	14	Allmendinger	Site PI 36
485	187.99	-70.0372	-19.966	9	7	14	Allmendinger	Site PI 36
486	205.042	-70.0374	-19.9663	9	7	14	Allmendinger	Site PI 36
487	204.684	-70.0375	-19.9665	9	7	14	Allmendinger	Site PI 36
488	165.387	-70.0371	-19.9668	9	7	14	Allmendinger	Site PI 36
489	50.8478	-70.037	-19.9669	9	7	14	Allmendinger	Site PI 36
490	189.595	-70.0368	-19.9669	9	7	14	Allmendinger	Site PI 36
491	347.1	-70.0175	-19.9283	9	7	14	Allmendinger	Site PI 35
492	208.834	-70.0175	-19.9283	9	7	14	Allmendinger	Site PI 35
493	349.276	-70.0174	-19.928	9	7	14	Allmendinger	Site PI 35
494	35.9621	-70.0174	-19.928	9	7	14	Allmendinger	Site PI 35
495	330.311	-70.0174	-19.928	9	7	14	Allmendinger	Site PI 35
496	8.53687	-70.0174	-19.928	9	7	14	Allmendinger	Site PI 35
497	59.5717	-70.0174	-19.928	9	7	14	Allmendinger	Site PI 35
498	329.582	-70.0174	-19.928	9	7	14	Allmendinger	Site PI 35
499	349.468	-70.0174	-19.928	9	7	14	Allmendinger	Site PI 35
500	16.2688	-70.0174	-19.9279	9	7	14	Allmendinger	Site PI 35
501	324.828	-70.0174	-19.9279	9	7	14	Allmendinger	Site PI 35
502	8.08542	-70.0173	-19.9277	9	7	14	Allmendinger	Site PI 35
503	97.3724	-70.0172	-19.9276	9	7	14	Allmendinger	Site PI 35
504	281.562	-70.0173	-19.9277	9	7	14	Allmendinger	Site PI 35
505	262.759	-70.0173	-19.9277	9	7	14	Allmendinger	Site PI 35
506	194.652	-70.0173	-19.9278	9	7	14	Allmendinger	Site PI 35
507	228.119	-70.0174	-19.9278	9	7	14	Allmendinger	Site PI 35
508	168.5	-70.0174	-19.9278	9	7	14	Allmendinger	Site PI 35
509	238.075	-70.0174	-19.9278	9	7	14	Allmendinger	Site PI 35
510	213.555	-70.0174	-19.9278	9	7	14	Allmendinger	Site PI 35
511	353.243	-70.0175	-19.9278	9	7	14	Allmendinger	Site PI 35
512	178.869	-70.0175	-19.9278	9	7	14	Allmendinger	Site PI 35
513	182.598	-70.0175	-19.9278	9	7	14	Allmendinger	Site PI 35
514	339.022	-70.0177	-19.9278	9	7	14	Allmendinger	Site PI 35
515	339.672	-70.0177	-19.9278	9	7	14	Allmendinger	Site PI 35
516	158.68	-70.0177	-19.9278	9	7	14	Allmendinger	Site PI 35
517	173.406	-70.0178	-19.9278	9	7	14	Allmendinger	Site PI 35
518	174.463	-70.0178	-19.9278	9	7	14	Allmendinger	Site PI 35
519	345.231	-70.0178	-19.9277	9	7	14	Allmendinger	Site PI 35
520	179.602	-70.0178	-19.9277	9	7	14	Allmendinger	Site PI 35
521	8.22223	-70.0178	-19.9276	9	7	14	Allmendinger	Site PI 35
522	187.827	-70.0178	-19.9277	9	7	14	Allmendinger	Site PI 35
523	7.30398	-70.0178	-19.9277	9	7	14	Allmendinger	Site PI 35
524	180.214	-70.0178	-19.9277	9	7	14	Allmendinger	Site PI 35
525	175.802	-70.0178	-19.9276	9	7	14	Allmendinger	Site PI 35
526	354.159	-70.0168	-19.926	9	7	14	Allmendinger	Site PI 35
527	4.96754	-70.0168	-19.926	9	7	14	Allmendinger	Site PI 35
528	356.729	-70.0168	-19.926	9	7	14	Allmendinger	Site PI 35
529	356.529	-70.0168	-19.926	9	7	14	Allmendinger	Site PI 35
530	187.571	-70.0168	-19.926	9	7	14	Allmendinger	Site PI 35
531	9.60318	-70.0168	-19.9259	9	7	14	Allmendinger	Site PI 35
532	349.627	-70.0167	-19.9259	9	7	14	Allmendinger	Site PI 35
533	213.037	-70.0167	-19.9259	9	7	14	Allmendinger	Site PI 35
534	30.6493	-70.0167	-19.9259	9	7	14	Allmendinger	Site PI 35
535	22.8775	-70.0167	-19.9258	9	7	14	Allmendinger	Site PI 35
536	209.6	-70.0168	-19.9253	9	7	14	Allmendinger	Site PI 35
537	229.666	-70.0167	-19.9255	9	7	14	Allmendinger	Site PI 35
538	224.138	-70.0166	-19.9254	9	7	14	Allmendinger	Site PI 35
539	317.873	-70.0166	-19.9251	9	7	14	Allmendinger	Site PI 35
540	225.755	-70.0165	-19.9249	9	7	14	Allmendinger	Site PI 35
541	203.117	-70.016	-19.9248	9	7	14	Allmendinger	Site PI 35
542	31.0064	-70.0158	-19.9248	9	7	14	Allmendinger	Site PI 35
543	222.745	-70.0157	-19.9249	9	7	14	Allmendinger	Site PI 35
544	116.07	-70.0157	-19.9249	9	7	14	Allmendinger	Site PI 35
545	195.674	-70.0157	-19.9249	9	7	14	Allmendinger	Site PI 35
546	207.1	-70.0157	-19.925	9	7	14	Allmendinger	Site PI 35
547	317.426	-70.0156	-19.925	9	7	14	Allmendinger	Site PI 35
548	10.6589	-69.9984	-19.9179	9	7	14	Allmendinger	Site PI 34
549	5.59763	-69.9984	-19.9177	9	7	14	Allmendinger	Site PI 34
550	319.015	-69.9984	-19.9175	9	7	14	Allmendinger	Site PI 34
551	150.047	-69.9982	-19.9175	9	7	14	Allmendinger	Site PI 34
552	321.874	-69.9984	-19.9175	9	7	14	Allmendinger	Site PI 34
553	191.735	-69.9952	-19.9181	9	7	14	Allmendinger	Site PI 34
554	221.062	-69.9952	-19.9182	9	7	14	Allmendinger	Site PI 34
555	238.892	-69.9953	-19.918	9	7	14	Allmendinger	Site PI 34
556	250.42	-69.9955	-19.9179	9	7	14	Allmendinger	Site PI 34
557	359.024	-69.9956	-19.9178	9	7	14	Allmendinger	Site PI 34
558	348.981	-69.9956	-19.9177	9	7	14	Allmendinger	Site PI 34
559	306.288	-69.9956	-19.9176	9	7	14	Allmendinger	Site PI 34
560	344.622	-69.9956	-19.9175	9	7	14	Allmendinger	Site PI 34
561	98.1882	-69.9956	-19.9174	9	7	14	Allmendinger	Site PI 34
562	86.0205	-69.9956	-19.9174	9	7	14	Allmendinger	Site PI 34
563	343.813	-69.9956	-19.9173	9	7	14	Allmendinger	Site PI 34
564	137.308	-69.9955	-19.9173	9	7	14	Allmendinger	Site PI 34
565	327.092	-69.9956	-19.9171	9	7	14	Allmendinger	Site PI 34
566	330.507	-69.9957	-19.917	9	7	14	Allmendinger	Site PI 34
567	277.752	-69.9968	-19.9174	9	7	14	Allmendinger	Site PI 34
568	34.5598	-69.9964	-19.9175	9	7	14	Allmendinger	Site PI 34
569	31.0939	-69.9962	-19.9176	9	7	14	Allmendinger	Site PI 34
570	23.2973	-69.9961	-19.9178	9	7	14	Allmendinger	Site PI 34
571	207.184	-69.9961	-19.9178	9	7	14	Allmendinger	Site PI 34
572	186.257	-69.996	-19.9179	9	7	14	Allmendinger	Site PI 34
573	190.834	-69.996	-19.9179	9	7	14	Allmendinger	Site PI 34
574	177.837	-69.996	-19.9179	9	7	14	Allmendinger	Site PI 34
575	359.645	-69.996	-19.9179	9	7	14	Allmendinger	Site PI 34
576	201.05	-69.9959	-19.9179	9	7	14	Allmendinger	Site PI 34
577	351.902	-69.9958	-19.918	9	7	14	Allmendinger	Site PI 34
578	183.71	-69.9958	-19.918	9	7	14	Allmendinger	Site PI 34
579	99.3732	-69.9957	-19.918	9	7	14	Allmendinger	Site PI 34
580	178.208	-69.9957	-19.918	9	7	14	Allmendinger	Site PI 34
581	179.135	-69.9955	-19.918	9	7	14	Allmendinger	Site PI 34
582	160.797	-69.9954	-19.918	9	7	14	Allmendinger	Site PI 34
583	214.835	-69.9954	-19.918	9	7	14	Allmendinger	Site PI 34
584	342.774	-69.9954	-19.9181	9	7	14	Allmendinger	Site PI 34
585	6.17318	-69.9953	-19.9182	9	7	14	Allmendinger	Site PI 34
586	6.54257	-69.9954	-19.9181	9	7	14	Allmendinger	Site PI 34
587	14.0466	-69.9953	-19.9181	9	7	14	Allmendinger	Site PI 34
588	111.793	-69.9319	-19.8972	9	7	14	Allmendinger	Site PI 33
589	139.755	-69.9319	-19.8973	9	7	14	Allmendinger	Site PI 33
590	316.215	-69.9316	-19.8972	9	7	14	Allmendinger	Site PI 33
591	312.603	-69.9316	-19.8972	9	7	14	Allmendinger	Site PI 33
592	311.096	-69.9317	-19.8972	9	7	14	Allmendinger	Site PI 33
593	315.821	-69.9317	-19.8971	9	7	14	Allmendinger	Site PI 33
594	306.835	-69.9317	-19.8971	9	7	14	Allmendinger	Site PI 33
595	306.479	-69.932	-19.897	9	7	14	Allmendinger	Site PI 33
596	288.589	-69.932	-19.897	9	7	14	Allmendinger	Site PI 33
597	293.381	-69.932	-19.897	9	7	14	Allmendinger	Site PI 33
598	302.663	-69.932	-19.8971	9	7	14	Allmendinger	Site PI 33
599	294.587	-69.9321	-19.8971	9	7	14	Allmendinger	Site PI 33
600	274.19	-69.9322	-19.8971	9	7	14	Allmendinger	Site PI 33
601	125.277	-69.9322	-19.8971	9	7	14	Allmendinger	Site PI 33
602	128.236	-69.9322	-19.8971	9	7	14	Allmendinger	Site PI 33
603	113.596	-69.9322	-19.8971	9	7	14	Allmendinger	Site PI 33
604	117.084	-69.9321	-19.8971	9	7	14	Allmendinger	Site PI 33
605	310.289	-69.9321	-19.8971	9	7	14	Allmendinger	Site PI 33
606	299.399	-69.9322	-19.897	9	7	14	Allmendinger	Site PI 33
607	324.735	-69.9322	-19.897	9	7	14	Allmendinger	Site PI 33
608	315.824	-69.9322	-19.897	9	7	14	Allmendinger	Site PI 33
609	280.409	-69.9323	-19.897	9	7	14	Allmendinger	Site PI 33
610	316.133	-69.9323	-19.897	9	7	14	Allmendinger	Site PI 33
611	294.689	-69.9323	-19.897	9	7	14	Allmendinger	Site PI 33
612	110.411	-69.9245	-19.9359	9	7	14	Allmendinger	Site PI 32
613	233.693	-69.9248	-19.9356	9	7	14	Allmendinger	Site PI 32
614	208.616	-69.9248	-19.9354	9	7	14	Allmendinger	Site PI 32
615	259.88	-69.9249	-19.9353	9	7	14	Allmendinger	Site PI 32
616	236.897	-69.9249	-19.9353	9	7	14	Allmendinger	Site PI 32
617	232.139	-69.9249	-19.9352	9	7	14	Allmendinger	Site PI 32
618	139.3	-69.8662	-19.9502	9	7	14	Allmendinger	Site PI 31
619	10.8653	-69.8662	-19.9502	9	7	14	Allmendinger	Site PI 31
620	15.263	-69.8662	-19.9502	9	7	14	Allmendinger	Site PI 31
621	345.112	-69.8662	-19.9502	9	7	14	Allmendinger	Site PI 31
622	10.0787	-69.8661	-19.9502	9	7	14	Allmendinger	Site PI 31
623	352.209	-69.8661	-19.9501	9	7	14	Allmendinger	Site PI 31
624	19.3377	-69.8661	-19.9501	9	7	14	Allmendinger	Site PI 31
625	359.01	-69.8661	-19.95	9	7	14	Allmendinger	Site PI 31
626	44.7451	-69.8659	-19.9499	9	7	14	Allmendinger	Site PI 31
627	225.175	-69.866	-19.95	9	7	14	Allmendinger	Site PI 31
628	3.67876	-69.866	-19.95	9	7	14	Allmendinger	Site PI 31
629	4.47274	-69.866	-19.9499	9	7	14	Allmendinger	Site PI 31
630	312.081	-69.8662	-19.9499	9	7	14	Allmendinger	Site PI 31
631	320.37	-69.8662	-19.9499	9	7	14	Allmendinger	Site PI 31
632	8.34535	-69.8661	-19.9496	9	7	14	Allmendinger	Site PI 31
633	31.3811	-69.8661	-19.9496	9	7	14	Allmendinger	Site PI 31
634	113.474	-69.8661	-19.9496	9	7	14	Allmendinger	Site PI 31
635	41.5618	-69.8661	-19.9496	9	7	14	Allmendinger	Site PI 31
636	219.308	-69.8661	-19.9496	9	7	14	Allmendinger	Site PI 31
637	208.678	-69.8661	-19.9496	9	7	14	Allmendinger	Site PI 31
638	321.085	-69.8661	-19.9496	9	7	14	Allmendinger	Site PI 31
639	23.2508	-69.8661	-19.9495	9	7	14	Allmendinger	Site PI 31
640	0.715004	-69.8662	-19.9494	9	7	14	Allmendinger	Site PI 31
641	199.295	-69.8663	-19.9493	9	7	14	Allmendinger	Site PI 31
642	352.394	-69.8664	-19.9493	9	7	14	Allmendinger	Site PI 31
643	337.498	-69.8664	-19.9494	9	7	14	Allmendinger	Site PI 31
644	175.145	-69.8665	-19.9494	9	7	14	Allmendinger	Site PI 31
645	56.3297	-69.8665	-19.9494	9	7	14	Allmendinger	Site PI 31
646	79.3183	-69.8665	-19.9494	9	7	14	Allmendinger	Site PI 31
647	150.559	-69.8665	-19.9495	9	7	14	Allmendinger	Site PI 31
648	42.7266	-69.8665	-19.9495	9	7	14	Allmendinger	Site PI 31
649	1.48517	-69.8665	-19.9495	9	7	14	Allmendinger	Site PI 31
650	222.138	-69.8664	-19.9495	9	7	14	Allmendinger	Site PI 31
651	41.8126	-69.8664	-19.9495	9	7	14	Allmendinger	Site PI 31
652	33.6589	-69.8663	-19.9495	9	7	14	Allmendinger	Site PI 31
653	37.1664	-69.8663	-19.9495	9	7	14	Allmendinger	Site PI 31
654	183.224	-69.8663	-19.9495	9	7	14	Allmendinger	Site PI 31
655	346.067	-69.8663	-19.9496	9	7	14	Allmendinger	Site PI 31
656	355.692	-69.8663	-19.9496	9	7	14	Allmendinger	Site PI 31
657	346.881	-69.8662	-19.9496	9	7	14	Allmendinger	Site PI 31
658	187.357	-69.8662	-19.9496	9	7	14	Allmendinger	Site PI 31
659	318.801	-69.8662	-19.9496	9	7	14	Allmendinger	Site PI 31
660	351.1	-69.8662	-19.9496	9	7	14	Allmendinger	Site PI 31
661	4.09007	-69.804	-19.9655	9	7	14	Allmendinger	Site PI 30
662	202.9	-69.804	-19.9655	9	7	14	Allmendinger	Site PI 30
663	335.038	-69.8039	-19.9656	9	7	14	Allmendinger	Site PI 30
664	356.1	-69.8042	-19.9652	9	7	14	Allmendinger	Site PI 30
665	160.371	-69.8041	-19.9652	9	7	14	Allmendinger	Site PI 30
666	85.2	-69.8041	-19.9651	9	7	14	Allmendinger	Site PI 30
667	63.9109	-69.8041	-19.9652	9	7	14	Allmendinger	Site PI 30
668	74.8173	-69.804	-19.9651	9	7	14	Allmendinger	Site PI 30
669	53.715	-69.804	-19.9651	9	7	14	Allmendinger	Site PI 30
670	39.5	-69.804	-19.9651	9	7	14	Allmendinger	Site PI 30
671	163.159	-69.8039	-19.9651	9	7	14	Allmendinger	Site PI 30
672	99.4513	-69.8039	-19.9651	9	7	14	Allmendinger	Site PI 30
673	303.396	-69.8039	-19.9651	9	7	14	Allmendinger	Site PI 30
674	143.501	-69.8038	-19.9652	9	7	14	Allmendinger	Site PI 30
675	342.948	-69.8038	-19.9652	9	7	14	Allmendinger	Site PI 30
676	89.236	-69.8038	-19.9652	9	7	14	Allmendinger	Site PI 30
677	74.2992	-69.8038	-19.9653	9	7	14	Allmendinger	Site PI 30
678	96.4	-69.8038	-19.9653	9	7	14	Allmendinger	Site PI 30
679	97.7503	-69.8038	-19.9653	9	7	14	Allmendinger	Site PI 30
680	80.7	-69.8038	-19.9653	9	7	14	Allmendinger	Site PI 30
681	30.7388	-69.8038	-19.9654	9	7	14	Allmendinger	Site PI 30
682	112.447	-69.8038	-19.9654	9	7	14	Allmendinger	Site PI 30
683	56.4487	-69.8038	-19.9654	9	7	14	Allmendinger	Site PI 30
684	83.8	-69.8037	-19.9654	9	7	14	Allmendinger	Site PI 30
685	227.079	-69.8037	-19.9655	9	7	14	Allmendinger	Site PI 30
686	109.322	-69.8037	-19.9656	9	7	14	Allmendinger	Site PI 30
687	115.795	-69.8037	-19.9657	9	7	14	Allmendinger	Site PI 30
688	92.8	-69.8037	-19.9657	9	7	14	Allmendinger	Site PI 30
689	250.184	-69.8037	-19.9657	9	7	14	Allmendinger	Site PI 30
690	67.078	-69.8037	-19.9657	9	7	14	Allmendinger	Site PI 30
691	65.9956	-69.8037	-19.9657	9	7	14	Allmendinger	Site PI 30
692	294.806	-69.8038	-19.9658	9	7	14	Allmendinger	Site PI 30
693	115.39	-69.8038	-19.9658	9	7	14	Allmendinger	Site PI 30
694	106.4	-69.8038	-19.9658	9	7	14	Allmendinger	Site PI 30
695	305.929	-69.8038	-19.9658	9	7	14	Allmendinger	Site PI 30
696	74.1304	-69.8037	-19.9658	9	7	14	Allmendinger	Site PI 30
697	205.9	-70.1226	-21.0347	8	7	14	Allmendinger	Site PI 29; 1 mm
698	355.615	-70.1244	-21.0364	8	7	14	Allmendinger	Site PI 29; 1 mm
699	197.794	-70.1259	-21.0372	8	7	14	Allmendinger	Site PI 29; 4 mm
700	172.342	-70.1268	-21.0375	8	7	14	Allmendinger	Site PI 29; 3 mm
701	159.207	-70.127	-21.0377	8	7	14	Allmendinger	Site PI 29; 3 mm
702	188.595	-70.1272	-21.0378	8	7	14	Allmendinger	Site PI 29; 4 mm
703	165.52	-70.1273	-21.0379	8	7	14	Allmendinger	Site PI 29; 5 mm
704	178.534	-70.1273	-21.0379	8	7	14	Allmendinger	Site PI 29; 4 mm
705	184.988	-70.1275	-21.038	8	7	14	Allmendinger	Site PI 29; 3 mm
706	159.145	-70.1276	-21.0379	8	7	14	Allmendinger	Site PI 29; 2 mm
707	185.156	-70.1272	-21.0403	8	7	14	Allmendinger	Site PI 29; 2 mm wide
708	177.741	-70.1271	-21.0403	8	7	14	Allmendinger	Site PI 29; 4 mm wide crack
709	209.717	-70.127	-21.0403	8	7	14	Allmendinger	Site PI 29; 3 mm wide crack
710	29.6938	-70.1268	-21.0403	8	7	14	Allmendinger	Site PI 29; 7.5 mm
711	206.067	-70.1267	-21.0403	8	7	14	Allmendinger	Site PI 29; 1 mm on transect. 1 15 m north of transect.
712	216.386	-70.1266	-21.0403	8	7	14	Allmendinger	Site PI 29; 5 m south of transect 2-4 mm fresh crack but does not seem to intersect transect. 1 mm on transect
713	190	-70.1265	-21.0403	8	7	14	Allmendinger	Site PI 29; 5 mm wide 10 m north of transect
714	190.138	-70.1264	-21.0404	8	7	14	Allmendinger	Site PI 29; 2 mm opening
715	23.4633	-70.1263	-21.0403	8	7	14	Allmendinger	Site PI 29; 3 mm opening.
716	28.8532	-70.1263	-21.0403	8	7	14	Allmendinger	Site PI 29; 6-7 mm on transect
717	187	-70.1261	-21.0404	8	7	14	Allmendinger	Site PI 29; 1 mm crack on transect. 2-3 10 south of transect
718	201.12	-70.126	-21.0404	8	7	14	Allmendinger	Site PI 29; 5 mm 15 m south of transect but only 1 mm on transect line
719	25.0633	-70.1256	-21.0404	8	7	14	Allmendinger	Site PI 29; 3 mm fresh crack
720	191.654	-70.1255	-21.0404	8	7	14	Allmendinger	Site PI 29; 1 cm 15 m north of transect but only 2-3 mm on transect
721	185.32	-70.1247	-21.0402	8	7	14	Allmendinger	Site PI 29; 2 mm fresh crack
722	7.13902	-70.1247	-21.0403	8	7	14	Allmendinger	Site PI 29; 2 mm crack
723	187.675	-70.1246	-21.0403	8	7	14	Allmendinger	Site PI 29; 4 +/- 1 mm fresh crack
724	172.82	-70.1244	-21.0402	8	7	14	Allmendinger	Site PI 29; 2 mm crack
725	11.7872	-70.1237	-21.04	8	7	14	Allmendinger	Site PI 29; 6 mm wide fresh crack
726	182.777	-70.1227	-21.04	8	7	14	Allmendinger	Site PI 29; 1 mm wide. Short crack
727	195.6	-70.123	-21.0399	8	7	14	Allmendinger	Site PI 29; 3 mm wide and 10s of meters long.
728	178.14	-70.1227	-21.0399	8	7	14	Allmendinger	Site PI 29; 1m fresh opening
729	183.593	-70.1222	-21.04	8	7	14	Allmendinger	Site PI 29; 2 mm?
730	180.535	-70.1202	-21.039	8	7	14	Allmendinger	Site PI 29; 2 +/- mm fresh opening
731	175.122	-70.1218	-21.0375	8	7	14	Allmendinger	Site PI 29; 0.5 mm fresh crack
732	149.266	-70.1241	-21.0379	8	7	14	Allmendinger	Site PI 29; 1-2 mm fresh opening but not on transect line
733	187.098	-70.1242	-21.0379	8	7	14	Allmendinger	Site PI 29; 2 mm fresh opening but doesn't reach transect line
734	181.087	-70.1265	-21.0388	8	7	14	Allmendinger	Site PI 29; 1 mm fresh crack
735	182.357	-70.1265	-21.0389	8	7	14	Allmendinger	Site PI 29; 6 mm fresh crack
736	178.948	-70.1264	-21.0388	8	7	14	Allmendinger	Site PI 29; 2 mm fresh crack
737	187.4	-70.127	-21.039	8	7	14	Allmendinger	Site PI 29; 1.5 m old crack with 1 cm fresh crack in middle
738	39.7247	-70.0996	-19.8442	7	7	14	Allmendinger	Site PI 28
739	190.312	-70.0983	-19.8369	7	7	14	Allmendinger	Site PI 28
740	183.818	-70.1026	-19.8249	7	7	14	Allmendinger	Site PI 28
741	191.191	-70.1026	-19.825	7	7	14	Allmendinger	Site PI 28
742	18.6824	-70.1025	-19.825	7	7	14	Allmendinger	Site PI 28
743	198.781	-70.1025	-19.825	7	7	14	Allmendinger	Site PI 28
744	211.231	-70.1025	-19.825	7	7	14	Allmendinger	Site PI 28
745	208.095	-70.1024	-19.825	7	7	14	Allmendinger	Site PI 28
746	191.545	-70.1023	-19.825	7	7	14	Allmendinger	Site PI 28
747	31.9166	-70.1023	-19.825	7	7	14	Allmendinger	Site PI 28
748	31.205	-70.1023	-19.8251	7	7	14	Allmendinger	Site PI 28
749	208.041	-70.1022	-19.825	7	7	14	Allmendinger	Site PI 28
750	210.243	-70.1021	-19.825	7	7	14	Allmendinger	Site PI 28
751	204.811	-70.1021	-19.8251	7	7	14	Allmendinger	Site PI 28
752	210.22	-70.102	-19.8251	7	7	14	Allmendinger	Site PI 28
753	13.499	-70.1019	-19.8252	7	7	14	Allmendinger	Site PI 28
754	310.955	-70.1021	-19.8252	7	7	14	Allmendinger	Site PI 28
755	306.631	-70.1021	-19.8253	7	7	14	Allmendinger	Site PI 28
756	29.2997	-70.102	-19.8253	7	7	14	Allmendinger	Site PI 28
757	306.256	-70.1019	-19.8253	7	7	14	Allmendinger	Site PI 28
758	214.8	-70.1019	-19.8254	7	7	14	Allmendinger	Site PI 28
759	27.4144	-70.1019	-19.8254	7	7	14	Allmendinger	Site PI 28
760	313.042	-70.1019	-19.8254	7	7	14	Allmendinger	Site PI 28
761	224.343	-70.1019	-19.8254	7	7	14	Allmendinger	Site PI 28
762	207.836	-70.1018	-19.8255	7	7	14	Allmendinger	Site PI 28
763	253.865	-70.1017	-19.8256	7	7	14	Allmendinger	Site PI 28
764	29.0148	-70.1015	-19.8258	7	7	14	Allmendinger	Site PI 28
765	162.993	-70.0985	-19.8275	7	7	14	Allmendinger	Site PI 28
766	166.013	-70.0985	-19.8275	7	7	14	Allmendinger	Site PI 28
767	343.8	-70.0985	-19.8275	7	7	14	Allmendinger	Site PI 28
768	179.708	-70.0985	-19.8275	7	7	14	Allmendinger	Site PI 28
769	175.978	-70.0985	-19.8275	7	7	14	Allmendinger	Site PI 28
770	173.31	-70.0985	-19.8275	7	7	14	Allmendinger	Site PI 28
771	179.857	-70.0985	-19.8275	7	7	14	Allmendinger	Site PI 28
772	166.768	-70.0985	-19.8275	7	7	14	Allmendinger	Site PI 28
773	172.419	-70.0985	-19.8275	7	7	14	Allmendinger	Site PI 28
774	171.572	-70.0985	-19.8275	7	7	14	Allmendinger	Site PI 28
775	169.254	-70.0982	-19.8274	7	7	14	Allmendinger	Site PI 28
776	185.154	-70.0984	-19.8274	7	7	14	Allmendinger	Site PI 28
777	178.479	-70.0984	-19.8275	7	7	14	Allmendinger	Site PI 28
778	119.172	-70.077	-19.8956	7	7	14	Allmendinger	Site PI 27
779	136.276	-70.0771	-19.8957	7	7	14	Allmendinger	Site PI 27
780	197.188	-70.0771	-19.8957	7	7	14	Allmendinger	Site PI 27
781	105.113	-70.077	-19.8958	7	7	14	Allmendinger	Site PI 27
782	152.54	-70.077	-19.8959	7	7	14	Allmendinger	Site PI 27
783	169.875	-70.0769	-19.8959	7	7	14	Allmendinger	Site PI 27
784	335.506	-70.0768	-19.896	7	7	14	Allmendinger	Site PI 27
785	120.522	-70.0768	-19.896	7	7	14	Allmendinger	Site PI 27
786	191.409	-70.0768	-19.8961	7	7	14	Allmendinger	Site PI 27
787	146.367	-70.0767	-19.8963	7	7	14	Allmendinger	Site PI 27
788	153.221	-70.0767	-19.8964	7	7	14	Allmendinger	Site PI 27
789	332.608	-70.0768	-19.8965	7	7	14	Allmendinger	Site PI 27
790	104.018	-70.0767	-19.8968	7	7	14	Allmendinger	Site PI 27
791	281.884	-70.0767	-19.8967	7	7	14	Allmendinger	Site PI 27
792	14.3255	-70.0767	-19.8966	7	7	14	Allmendinger	Site PI 27
793	158.331	-70.0768	-19.8965	7	7	14	Allmendinger	Site PI 27
794	286.263	-70.0768	-19.8965	7	7	14	Allmendinger	Site PI 27
795	346.686	-70.0768	-19.8964	7	7	14	Allmendinger	Site PI 27
796	158.86	-70.0768	-19.8964	7	7	14	Allmendinger	Site PI 27
797	288.971	-70.0767	-19.8964	7	7	14	Allmendinger	Site PI 27
798	214.937	-70.0767	-19.8964	7	7	14	Allmendinger	Site PI 27
799	159.018	-70.0767	-19.8964	7	7	14	Allmendinger	Site PI 27
800	163.955	-70.0767	-19.8962	7	7	14	Allmendinger	Site PI 27
801	336.916	-70.0767	-19.8963	7	7	14	Allmendinger	Site PI 27
802	346.012	-70.0767	-19.8963	7	7	14	Allmendinger	Site PI 27
803	350.233	-70.0768	-19.8962	7	7	14	Allmendinger	Site PI 27
804	347.012	-70.0768	-19.8961	7	7	14	Allmendinger	Site PI 27
805	336.409	-70.0768	-19.896	7	7	14	Allmendinger	Site PI 27
806	124.669	-70.0768	-19.896	7	7	14	Allmendinger	Site PI 27
807	156.677	-70.0768	-19.8959	7	7	14	Allmendinger	Site PI 27
808	346.886	-70.0768	-19.8959	7	7	14	Allmendinger	Site PI 27
809	335.586	-70.0768	-19.8959	7	7	14	Allmendinger	Site PI 27
810	182.22	-70.0769	-19.8958	7	7	14	Allmendinger	Site PI 27
811	353.99	-70.0769	-19.8958	7	7	14	Allmendinger	Site PI 27
812	322.274	-70.077	-19.8957	7	7	14	Allmendinger	Site PI 27
813	297.569	-70.077	-19.8957	7	7	14	Allmendinger	Site PI 27
814	215.451	-70.077	-19.8958	7	7	14	Allmendinger	Site PI 27
815	319.584	-70.0771	-19.8958	7	7	14	Allmendinger	Site PI 27
816	148.77	-70.0771	-19.8958	7	7	14	Allmendinger	Site PI 27
817	320.431	-70.0772	-19.8958	7	7	14	Allmendinger	Site PI 27
818	161.131	-70.0772	-19.8958	7	7	14	Allmendinger	Site PI 27
819	26.25	-70.0773	-19.8958	7	7	14	Allmendinger	Site PI 27
820	293.411	-70.0773	-19.8958	7	7	14	Allmendinger	Site PI 27
821	288.411	-70.0773	-19.8958	7	7	14	Allmendinger	Site PI 27
822	152.147	-70.0774	-19.8958	7	7	14	Allmendinger	Site PI 27
823	96.9283	-70.0774	-19.8958	7	7	14	Allmendinger	Site PI 27
824	297.329	-70.0774	-19.8958	7	7	14	Allmendinger	Site PI 27
825	218.395	-70.0774	-19.8957	7	7	14	Allmendinger	Site PI 27
826	196.553	-70.0774	-19.8957	7	7	14	Allmendinger	Site PI 27
827	353.211	-70.0772	-19.8957	7	7	14	Allmendinger	Site PI 27
828	105.332	-70.0773	-19.8957	7	7	14	Allmendinger	Site PI 27
829	332.576	-70.0773	-19.8957	7	7	14	Allmendinger	Site PI 27
830	333.671	-70.0772	-19.8956	7	7	14	Allmendinger	Site PI 27
831	74.1	-70.0752	-19.85	7	7	14	Allmendinger	Site PI 26
832	66.7711	-70.0751	-19.8499	7	7	14	Allmendinger	Site PI 26
833	75.8774	-70.0749	-19.8496	7	7	14	Allmendinger	Site PI 26
834	265.7	-70.0748	-19.8499	7	7	14	Allmendinger	Site PI 26
835	92.5453	-70.0748	-19.8499	7	7	14	Allmendinger	Site PI 26
836	285.3	-70.0748	-19.8499	7	7	14	Allmendinger	Site PI 26
837	98.4436	-70.0748	-19.8499	7	7	14	Allmendinger	Site PI 26
838	291.41	-70.0747	-19.8499	7	7	14	Allmendinger	Site PI 26
839	290.5	-70.0747	-19.8498	7	7	14	Allmendinger	Site PI 26
840	315.725	-70.0746	-19.8499	7	7	14	Allmendinger	Site PI 26
841	117.122	-70.0745	-19.8499	7	7	14	Allmendinger	Site PI 26
842	128.888	-70.0744	-19.8495	7	7	14	Allmendinger	Site PI 26
843	110.084	-70.0744	-19.8494	7	7	14	Allmendinger	Site PI 26; ?
844	8.1589	-70.0744	-19.8494	7	7	14	Allmendinger	Site PI 26
845	13.1195	-70.0744	-19.8495	7	7	14	Allmendinger	Site PI 26
846	300.569	-70.0745	-19.8496	7	7	14	Allmendinger	Site PI 26
847	140.553	-70.0745	-19.8497	7	7	14	Allmendinger	Site PI 26
848	289.582	-70.0744	-19.8497	7	7	14	Allmendinger	Site PI 26
849	283.114	-70.0744	-19.8498	7	7	14	Allmendinger	Site PI 26
850	278.492	-70.0743	-19.8499	7	7	14	Allmendinger	Site PI 26
851	309.091	-70.0744	-19.8499	7	7	14	Allmendinger	Site PI 26
852	272.811	-70.0744	-19.8499	7	7	14	Allmendinger	Site PI 26
853	282.072	-70.0744	-19.8498	7	7	14	Allmendinger	Site PI 26
854	111.858	-70.0745	-19.8499	7	7	14	Allmendinger	Site PI 26
855	19.7893	-70.0682	-19.812	7	7	14	Allmendinger	Site PI 25
856	331.867	-70.0681	-19.8122	7	7	14	Allmendinger	Site PI 25
857	196.7	-70.0678	-19.8121	7	7	14	Allmendinger	Site PI 25
858	23.22	-70.0679	-19.8121	7	7	14	Allmendinger	Site PI 25
859	8.75449	-70.0678	-19.8121	7	7	14	Allmendinger	Site PI 25
860	213.72	-70.0342	-19.8735	6	7	14	Allmendinger	Site PI 24
861	248.74	-70.0342	-19.8736	6	7	14	Allmendinger	Site PI 24
862	10.6648	-70.0343	-19.8735	6	7	14	Allmendinger	Site PI 24
863	338.149	-70.0343	-19.8735	6	7	14	Allmendinger	Site PI 24
864	317.179	-70.0343	-19.8734	6	7	14	Allmendinger	Site PI 24
865	231.283	-70.0343	-19.8733	6	7	14	Allmendinger	Site PI 24
866	346.021	-70.0343	-19.8733	6	7	14	Allmendinger	Site PI 24
867	238.037	-70.0343	-19.8733	6	7	14	Allmendinger	Site PI 24
868	282.085	-70.0342	-19.8733	6	7	14	Allmendinger	Site PI 24
869	275.381	-70.0342	-19.8733	6	7	14	Allmendinger	Site PI 24
870	184.669	-70.0342	-19.8734	6	7	14	Allmendinger	Site PI 24
871	246.151	-70.0342	-19.8734	6	7	14	Allmendinger	Site PI 24
872	172.62	-70.0342	-19.8734	6	7	14	Allmendinger	Site PI 24
873	187.858	-70.0342	-19.8734	6	7	14	Allmendinger	Site PI 24
874	228.383	-70.0343	-19.8734	6	7	14	Allmendinger	Site PI 24
875	47.2383	-70.015	-19.8699	6	7	14	Allmendinger	Site PI 23
876	247.902	-70.015	-19.8699	6	7	14	Allmendinger	Site PI 23
877	170.261	-70.0148	-19.8701	6	7	14	Allmendinger	Site PI 23
878	173.124	-70.0148	-19.8708	6	7	14	Allmendinger	Site PI 23
879	180.513	-70.0148	-19.8709	6	7	14	Allmendinger	Site PI 23
880	159.716	-70.0148	-19.8709	6	7	14	Allmendinger	Site PI 23
881	184.625	-70.015	-19.8714	6	7	14	Allmendinger	Site PI 23
882	264.323	-70.015	-19.8714	6	7	14	Allmendinger	Site PI 23
883	355.698	-70.015	-19.8715	6	7	14	Allmendinger	Site PI 23
884	231.47	-70.0151	-19.8715	6	7	14	Allmendinger	Site PI 23
885	19.1387	-70.0151	-19.8715	6	7	14	Allmendinger	Site PI 23
886	332.786	-70.0153	-19.8714	6	7	14	Allmendinger	Site PI 23
887	148.077	-70.0152	-19.8712	6	7	14	Allmendinger	Site PI 23
888	18.6122	-70.0152	-19.8712	6	7	14	Allmendinger	Site PI 23
889	19.5117	-70.0152	-19.8712	6	7	14	Allmendinger	Site PI 23
890	345.528	-70.0153	-19.871	6	7	14	Allmendinger	Site PI 23
891	167.453	-70.0152	-19.8709	6	7	14	Allmendinger	Site PI 23
892	195.315	-70.0152	-19.8709	6	7	14	Allmendinger	Site PI 23
893	2.18696	-70.0151	-19.8708	6	7	14	Allmendinger	Site PI 23
894	187.403	-70.0152	-19.8707	6	7	14	Allmendinger	Site PI 23
895	210.789	-70.0152	-19.8705	6	7	14	Allmendinger	Site PI 23
896	19.6292	-70.0152	-19.8705	6	7	14	Allmendinger	Site PI 23
897	206.592	-70.0152	-19.8704	6	7	14	Allmendinger	Site PI 23
898	344.945	-70.0151	-19.8704	6	7	14	Allmendinger	Site PI 23
899	182.362	-70.0151	-19.8704	6	7	14	Allmendinger	Site PI 23
900	344.4	-70.0151	-19.8703	6	7	14	Allmendinger	Site PI 23
901	182.562	-70.0151	-19.8702	6	7	14	Allmendinger	Site PI 23
902	194.377	-70.0151	-19.8703	6	7	14	Allmendinger	Site PI 23
903	2.16185	-70.0152	-19.8702	6	7	14	Allmendinger	Site PI 23
904	13.1677	-70.0152	-19.8702	6	7	14	Allmendinger	Site PI 23
905	11.1594	-70.0151	-19.8702	6	7	14	Allmendinger	Site PI 23
906	2.25156	-70.0151	-19.8702	6	7	14	Allmendinger	Site PI 23
907	246.34	-70.0151	-19.8702	6	7	14	Allmendinger	Site PI 23
908	8.10033	-70.0151	-19.8702	6	7	14	Allmendinger	Site PI 23
909	339.571	-70.0151	-19.8702	6	7	14	Allmendinger	Site PI 23
910	347.278	-70.0151	-19.8701	6	7	14	Allmendinger	Site PI 23
911	242.079	-70.0151	-19.8701	6	7	14	Allmendinger	Site PI 23
912	358.572	-70.0151	-19.8701	6	7	14	Allmendinger	Site PI 23
913	12.1031	-70.0151	-19.8701	6	7	14	Allmendinger	Site PI 23
914	9.62611	-70.0151	-19.87	6	7	14	Allmendinger	Site PI 23
915	15.4057	-70.0151	-19.8699	6	7	14	Allmendinger	Site PI 23
916	71.9695	-70.015	-19.87	6	7	14	Allmendinger	Site PI 23
917	2.91108	-70.015	-19.8699	6	7	14	Allmendinger	Site PI 23
918	354.17	-70.015	-19.8699	6	7	14	Allmendinger	Site PI 23
919	168.71	-70.015	-19.8699	6	7	14	Allmendinger	Site PI 23
920	61.6816	-70.015	-19.8699	6	7	14	Allmendinger	Site PI 23
921	238.442	-70.0149	-19.8699	6	7	14	Allmendinger	Site PI 23
922	358.622	-70.015	-19.8698	6	7	14	Allmendinger	Site PI 23
923	348.23	-70.015	-19.8697	6	7	14	Allmendinger	Site PI 23
924	321.096	-70.015	-19.8697	6	7	14	Allmendinger	Site PI 23
925	324.348	-70.015	-19.8697	6	7	14	Allmendinger	Site PI 23
926	358.195	-70.0128	-19.8665	6	7	14	Allmendinger	Site PI 23
927	356.88	-70.0128	-19.8666	6	7	14	Allmendinger	Site PI 23
928	168.588	-70.0128	-19.8666	6	7	14	Allmendinger	Site PI 23
929	201.044	-70.0128	-19.8666	6	7	14	Allmendinger	Site PI 23
930	209.325	-70.0128	-19.8666	6	7	14	Allmendinger	Site PI 23
931	173.444	-70.0128	-19.8666	6	7	14	Allmendinger	Site PI 23
932	210.605	-70.0128	-19.8667	6	7	14	Allmendinger	Site PI 23
933	182.781	-70.0128	-19.8667	6	7	14	Allmendinger	Site PI 23
934	197.475	-70.0127	-19.8667	6	7	14	Allmendinger	Site PI 23
935	193.686	-70.0127	-19.8667	6	7	14	Allmendinger	Site PI 23
936	193.17	-70.0127	-19.8667	6	7	14	Allmendinger	Site PI 23
937	252.06	-70.0127	-19.8667	6	7	14	Allmendinger	Site PI 23
938	201.089	-70.0126	-19.8668	6	7	14	Allmendinger	Site PI 23
939	24.8286	-70.0126	-19.8668	6	7	14	Allmendinger	Site PI 23
940	358.386	-70.0126	-19.8667	6	7	14	Allmendinger	Site PI 23
941	5.83936	-70.0126	-19.8667	6	7	14	Allmendinger	Site PI 23
942	197.595	-70.0126	-19.8667	6	7	14	Allmendinger	Site PI 23
943	182.055	-70.0126	-19.8668	6	7	14	Allmendinger	Site PI 23
944	192.712	-70.0125	-19.8668	6	7	14	Allmendinger	Site PI 23
945	30.6786	-70.0125	-19.8668	6	7	14	Allmendinger	Site PI 23
946	220.139	-70.0125	-19.8668	6	7	14	Allmendinger	Site PI 23
947	205.946	-70.0125	-19.8668	6	7	14	Allmendinger	Site PI 23
948	198.088	-70.0125	-19.8668	6	7	14	Allmendinger	Site PI 23
949	218.001	-70.0124	-19.8668	6	7	14	Allmendinger	Site PI 23
950	185.381	-70.0124	-19.8668	6	7	14	Allmendinger	Site PI 23
951	128.527	-70.0124	-19.8668	6	7	14	Allmendinger	Site PI 23
952	205.817	-70.0124	-19.8669	6	7	14	Allmendinger	Site PI 23
953	258.673	-70.0125	-19.8669	6	7	14	Allmendinger	Site PI 23
954	186.3	-70.0125	-19.867	6	7	14	Allmendinger	Site PI 23
955	100.941	-70.0125	-19.8671	6	7	14	Allmendinger	Site PI 23
956	197.493	-70.0125	-19.8671	6	7	14	Allmendinger	Site PI 23
957	202.513	-70.0125	-19.8671	6	7	14	Allmendinger	Site PI 23
958	192.942	-70.0124	-19.8672	6	7	14	Allmendinger	Site PI 23
959	346.406	-70.0124	-19.8673	6	7	14	Allmendinger	Site PI 23
960	6.38032	-70.0124	-19.8673	6	7	14	Allmendinger	Site PI 23
961	217.557	-70.0124	-19.8672	6	7	14	Allmendinger	Site PI 23
962	216.774	-70.0124	-19.8672	6	7	14	Allmendinger	Site PI 23
963	212.937	-70.0125	-19.8672	6	7	14	Allmendinger	Site PI 23
964	244.956	-70.0125	-19.8672	6	7	14	Allmendinger	Site PI 23
965	42.6957	-70.0127	-19.8674	6	7	14	Allmendinger	Site PI 23
966	229.582	-70.0127	-19.8674	6	7	14	Allmendinger	Site PI 23
967	182.853	-70.0127	-19.8675	6	7	14	Allmendinger	Site PI 23
968	215.562	-70.0127	-19.8675	6	7	14	Allmendinger	Site PI 23
969	327.423	-70.0129	-19.8676	6	7	14	Allmendinger	Site PI 23
970	245.565	-70.0129	-19.8675	6	7	14	Allmendinger	Site PI 23
971	352.165	-70.0129	-19.8675	6	7	14	Allmendinger	Site PI 23
972	242.919	-70.0129	-19.8675	6	7	14	Allmendinger	Site PI 23
973	345.642	-70.0129	-19.8674	6	7	14	Allmendinger	Site PI 23
974	53.4714	-70.0128	-19.8674	6	7	14	Allmendinger	Site PI 23
975	1.19984	-70.0128	-19.8674	6	7	14	Allmendinger	Site PI 23
976	332.707	-70.0128	-19.8674	6	7	14	Allmendinger	Site PI 23
977	31.5212	-70.0128	-19.8673	6	7	14	Allmendinger	Site PI 23
978	32.754	-70.0128	-19.8673	6	7	14	Allmendinger	Site PI 23
979	182.763	-70.0128	-19.8673	6	7	14	Allmendinger	Site PI 23
980	196.007	-70.0128	-19.8673	6	7	14	Allmendinger	Site PI 23
981	196.615	-70.0128	-19.8673	6	7	14	Allmendinger	Site PI 23
982	43.9965	-70.0128	-19.8673	6	7	14	Allmendinger	Site PI 23
983	7.7	-69.9964	-19.8778	6	7	14	Allmendinger	Site PI 22
984	353	-69.9963	-19.8778	6	7	14	Allmendinger	Site PI 22
985	202.2	-69.9966	-19.8791	6	7	14	Allmendinger	Site PI 22
986	216.8	-69.9966	-19.8791	6	7	14	Allmendinger	Site PI 22
987	192.9	-69.9966	-19.8791	6	7	14	Allmendinger	Site PI 22
988	188.3	-69.9966	-19.879	6	7	14	Allmendinger	Site PI 22
989	226.8	-69.9967	-19.8787	6	7	14	Allmendinger	Site PI 22
990	35.3	-69.9967	-19.8787	6	7	14	Allmendinger	Site PI 22
991	210.6	-69.9967	-19.8787	6	7	14	Allmendinger	Site PI 22
992	27.8	-69.9967	-19.8787	6	7	14	Allmendinger	Site PI 22
993	197.9	-69.9967	-19.8787	6	7	14	Allmendinger	Site PI 22
994	195.9	-69.9967	-19.8787	6	7	14	Allmendinger	Site PI 22
995	25.6	-69.9967	-19.8787	6	7	14	Allmendinger	Site PI 22
996	23.1	-69.9967	-19.8787	6	7	14	Allmendinger	Site PI 22
997	37.2	-69.9967	-19.8787	6	7	14	Allmendinger	Site PI 22
998	45.6507	-69.9967	-19.8787	6	7	14	Allmendinger	Site PI 22
999	232.919	-69.9967	-19.8787	6	7	14	Allmendinger	Site PI 22
1000	27.1655	-69.9967	-19.8787	6	7	14	Allmendinger	Site PI 22
1001	5.54952	-69.9967	-19.8787	6	7	14	Allmendinger	Site PI 22
1002	24.8476	-69.9967	-19.8787	6	7	14	Allmendinger	Site PI 22
1003	26.4783	-69.9967	-19.8787	6	7	14	Allmendinger	Site PI 22
1004	312.387	-69.9967	-19.8787	6	7	14	Allmendinger	Site PI 22
1005	26.3628	-69.9967	-19.8787	6	7	14	Allmendinger	Site PI 22
1006	192.109	-69.9967	-19.8787	6	7	14	Allmendinger	Site PI 22
1007	10.7897	-69.9967	-19.8787	6	7	14	Allmendinger	Site PI 22
1008	27.9252	-69.9967	-19.8787	6	7	14	Allmendinger	Site PI 22
1009	25.7684	-69.9967	-19.8787	6	7	14	Allmendinger	Site PI 22
1010	24.8329	-69.9967	-19.8787	6	7	14	Allmendinger	Site PI 22
1011	11.7552	-69.9967	-19.8787	6	7	14	Allmendinger	Site PI 22
1012	203.938	-69.9967	-19.8787	6	7	14	Allmendinger	Site PI 22
1013	20.7397	-69.9967	-19.8787	6	7	14	Allmendinger	Site PI 22
1014	200.837	-69.9966	-19.8787	6	7	14	Allmendinger	Site PI 22
1015	46.3025	-69.9966	-19.8786	6	7	14	Allmendinger	Site PI 22
1016	36.0296	-69.9966	-19.8786	6	7	14	Allmendinger	Site PI 22
1017	33.2253	-69.9966	-19.8786	6	7	14	Allmendinger	Site PI 22
1018	38.9006	-69.9966	-19.8786	6	7	14	Allmendinger	Site PI 22
1019	19.8063	-69.9965	-19.8786	6	7	14	Allmendinger	Site PI 22
1020	63.1398	-69.9965	-19.8786	6	7	14	Allmendinger	Site PI 22
1021	355.608	-69.9965	-19.8786	6	7	14	Allmendinger	Site PI 22
1022	17.4812	-69.9966	-19.8786	6	7	14	Allmendinger	Site PI 22
1023	359.879	-69.9966	-19.8785	6	7	14	Allmendinger	Site PI 22
1024	210.945	-69.9965	-19.8785	6	7	14	Allmendinger	Site PI 22
1025	353.014	-69.9965	-19.8785	6	7	14	Allmendinger	Site PI 22
1026	182.431	-69.9965	-19.8785	6	7	14	Allmendinger	Site PI 22
1027	208.814	-69.9965	-19.8785	6	7	14	Allmendinger	Site PI 22
1028	356.283	-69.9965	-19.8785	6	7	14	Allmendinger	Site PI 22
1029	340.646	-69.9964	-19.8785	6	7	14	Allmendinger	Site PI 22
1030	223.448	-69.9964	-19.8785	6	7	14	Allmendinger	Site PI 22
1031	57.0426	-69.9964	-19.8785	6	7	14	Allmendinger	Site PI 22
1032	219.7	-69.9964	-19.8784	6	7	14	Allmendinger	Site PI 22
1033	214.397	-69.9964	-19.8785	6	7	14	Allmendinger	Site PI 22
1034	340.53	-69.9964	-19.8785	6	7	14	Allmendinger	Site PI 22
1035	211.688	-69.9964	-19.8785	6	7	14	Allmendinger	Site PI 22
1036	205.887	-69.9965	-19.8784	6	7	14	Allmendinger	Site PI 22
1037	58.0188	-69.9965	-19.8784	6	7	14	Allmendinger	Site PI 22
1038	186.352	-69.9965	-19.8784	6	7	14	Allmendinger	Site PI 22
1039	43.2819	-69.9965	-19.8784	6	7	14	Allmendinger	Site PI 22
1040	216.093	-69.9965	-19.8784	6	7	14	Allmendinger	Site PI 22
1041	28.6624	-69.9965	-19.8784	6	7	14	Allmendinger	Site PI 22
1042	339.206	-69.9965	-19.8783	6	7	14	Allmendinger	Site PI 22
1043	146.136	-69.9965	-19.8783	6	7	14	Allmendinger	Site PI 22
1044	218.31	-69.9965	-19.8783	6	7	14	Allmendinger	Site PI 22
1045	192.14	-69.9965	-19.8783	6	7	14	Allmendinger	Site PI 22
1046	224.891	-69.9965	-19.8783	6	7	14	Allmendinger	Site PI 22
1047	207.054	-69.9965	-19.8782	6	7	14	Allmendinger	Site PI 22
1048	359.818	-69.9965	-19.8782	6	7	14	Allmendinger	Site PI 22
1049	60.9302	-69.9965	-19.8782	6	7	14	Allmendinger	Site PI 22
1050	335.434	-69.9966	-19.8782	6	7	14	Allmendinger	Site PI 22
1051	41.2066	-69.9966	-19.8782	6	7	14	Allmendinger	Site PI 22
1052	29.5292	-69.9966	-19.8782	6	7	14	Allmendinger	Site PI 22
1053	236.133	-69.9966	-19.8782	6	7	14	Allmendinger	Site PI 22
1054	37.3347	-69.9966	-19.8782	6	7	14	Allmendinger	Site PI 22
1055	8.88711	-69.9966	-19.8782	6	7	14	Allmendinger	Site PI 22
1056	37.6628	-69.9966	-19.8782	6	7	14	Allmendinger	Site PI 22
1057	27.0388	-69.9966	-19.8781	6	7	14	Allmendinger	Site PI 22
1058	189.335	-69.9966	-19.8782	6	7	14	Allmendinger	Site PI 22
1059	57.5512	-69.9965	-19.8782	6	7	14	Allmendinger	Site PI 22
1060	19.6395	-69.9965	-19.8781	6	7	14	Allmendinger	Site PI 22
1061	35.1483	-69.9965	-19.8781	6	7	14	Allmendinger	Site PI 22
1062	224.439	-69.9965	-19.8781	6	7	14	Allmendinger	Site PI 22
1063	183.079	-69.9965	-19.8781	6	7	14	Allmendinger	Site PI 22
1064	65.5859	-69.9965	-19.8781	6	7	14	Allmendinger	Site PI 22
1065	23.5796	-69.9965	-19.8781	6	7	14	Allmendinger	Site PI 22
1066	16.2491	-69.9965	-19.8781	6	7	14	Allmendinger	Site PI 22
1067	45.7811	-69.9965	-19.8781	6	7	14	Allmendinger	Site PI 22
1068	342.079	-69.9965	-19.8781	6	7	14	Allmendinger	Site PI 22
1069	232.088	-69.9965	-19.8781	6	7	14	Allmendinger	Site PI 22
1070	229.769	-69.9965	-19.8781	6	7	14	Allmendinger	Site PI 22
1071	221.429	-69.9965	-19.8781	6	7	14	Allmendinger	Site PI 22
1072	235.849	-69.9965	-19.878	6	7	14	Allmendinger	Site PI 22
1073	82.3477	-69.9965	-19.878	6	7	14	Allmendinger	Site PI 22
1074	28.6489	-69.9965	-19.878	6	7	14	Allmendinger	Site PI 22
1075	227.797	-69.9965	-19.878	6	7	14	Allmendinger	Site PI 22
1076	192.006	-69.9965	-19.8779	6	7	14	Allmendinger	Site PI 22
1077	52.6895	-69.9965	-19.878	6	7	14	Allmendinger	Site PI 22
1078	7.94876	-69.9965	-19.8779	6	7	14	Allmendinger	Site PI 22
1079	72.3011	-69.9965	-19.8779	6	7	14	Allmendinger	Site PI 22
1080	74.5427	-69.9965	-19.8779	6	7	14	Allmendinger	Site PI 22
1081	26.4363	-69.9965	-19.8779	6	7	14	Allmendinger	Site PI 22
1082	40.3251	-69.9964	-19.8778	6	7	14	Allmendinger	Site PI 22
1083	200.816	-69.9964	-19.8778	6	7	14	Allmendinger	Site PI 22
1084	39.4708	-69.9964	-19.8779	6	7	14	Allmendinger	Site PI 22
1085	345.453	-69.9798	-19.8084	6	7	14	Allmendinger	Site PI 21
1086	125.979	-69.9797	-19.8081	6	7	14	Allmendinger	Site PI 21
1087	322.724	-69.9797	-19.8082	6	7	14	Allmendinger	Site PI 21
1088	346.039	-69.9798	-19.8083	6	7	14	Allmendinger	Site PI 21
1089	300.101	-69.9799	-19.8086	6	7	14	Allmendinger	Site PI 21
1090	170.399	-69.9802	-19.8098	6	7	14	Allmendinger	Site PI 21
1091	121.588	-69.9803	-19.8105	6	7	14	Allmendinger	Site PI 21
1092	3.86069	-69.9804	-19.8105	6	7	14	Allmendinger	Site PI 21
1093	136.392	-69.9805	-19.8106	6	7	14	Allmendinger	Site PI 21
1094	306.393	-69.9805	-19.8107	6	7	14	Allmendinger	Site PI 21
1095	320.969	-69.9806	-19.8107	6	7	14	Allmendinger	Site PI 21
1096	297.365	-69.9806	-19.8108	6	7	14	Allmendinger	Site PI 21
1097	323.955	-69.9807	-19.8108	6	7	14	Allmendinger	Site PI 21
1098	236.292	-69.9954	-19.8059	6	7	14	Allmendinger	Site PI 20
1099	332.905	-69.9948	-19.8053	6	7	14	Allmendinger	Site PI 20
1100	337.661	-69.996	-19.8059	6	7	14	Allmendinger	Site PI 20
1101	131.342	-69.9967	-19.8061	6	7	14	Allmendinger	Site PI 20
1102	342.649	-69.9968	-19.8049	6	7	14	Allmendinger	Site PI 20
1103	323.41	-69.9969	-19.8054	6	7	14	Allmendinger	Site PI 20
1104	0.007973	-69.9964	-19.8067	6	7	14	Allmendinger	Site PI 20
1105	265.656	-69.9967	-19.8067	6	7	14	Allmendinger	Site PI 20
1106	268.5	-70.0011	-19.7889	6	7	14	Allmendinger	Site PI 19
1107	104.332	-70.0011	-19.7887	6	7	14	Allmendinger	Site PI 19
1108	328.255	-70.0153	-19.7862	6	7	14	Allmendinger	Site PI 18
1109	305.946	-70.0155	-19.7864	6	7	14	Allmendinger	Site PI 18
1110	103.472	-70.013	-19.7817	6	7	14	Allmendinger	Site PI 17
1111	322.183	-70.013	-19.7814	6	7	14	Allmendinger	Site PI 17
1112	13.2285	-70.013	-19.7813	6	7	14	Allmendinger	Site PI 17
1113	112.131	-70.0125	-19.7815	6	7	14	Allmendinger	Site PI 17
1114	81.8993	-70.0127	-19.7819	6	7	14	Allmendinger	Site PI 17
1115	189.299	-70.0127	-19.7819	6	7	14	Allmendinger	Site PI 17
1116	357.35	-70.0128	-19.7818	6	7	14	Allmendinger	Site PI 17
1117	188.751	-70.0132	-19.7814	6	7	14	Allmendinger	Site PI 17
1118	117.602	-70.0123	-19.7796	6	7	14	Allmendinger	Site PI 17
1119	344.514	-70.0118	-19.7788	6	7	14	Allmendinger	Site PI 17
1120	162.504	-70.0118	-19.7789	6	7	14	Allmendinger	Site PI 17
1121	171.104	-70.0124	-19.7795	6	7	14	Allmendinger	Site PI 17
1122	117.455	-70.0125	-19.7795	6	7	14	Allmendinger	Site PI 17
1123	136.1	-70.0126	-19.7796	6	7	14	Allmendinger	Site PI 17
1124	330.454	-70.0147	-19.769	6	7	14	Allmendinger	Site PI 16
1125	346.614	-70.0151	-19.7676	6	7	14	Allmendinger	Site PI 16
1126	321.447	-70.015	-19.7675	6	7	14	Allmendinger	Site PI 16
1127	343.76	-70.0151	-19.7675	6	7	14	Allmendinger	Site PI 16
1128	342.487	-70.0152	-19.7675	6	7	14	Allmendinger	Site PI 16
1129	336.501	-70.0153	-19.7675	6	7	14	Allmendinger	Site PI 16
1130	337.912	-70.0152	-19.7674	6	7	14	Allmendinger	Site PI 16
1131	23.7743	-70.0152	-19.7674	6	7	14	Allmendinger	Site PI 16
1132	0.726158	-70.0153	-19.7671	6	7	14	Allmendinger	Site PI 16
1133	322.587	-70.0153	-19.7671	6	7	14	Allmendinger	Site PI 16
1134	320.986	-70.0156	-19.7667	6	7	14	Allmendinger	Site PI 16
1135	162.021	-70.0142	-19.767	6	7	14	Allmendinger	Site PI 16
1136	166.922	-70.014	-19.7671	6	7	14	Allmendinger	Site PI 16
1137	132.569	-70.0139	-19.7671	6	7	14	Allmendinger	Site PI 16
1138	326.751	-70.0136	-19.7671	6	7	14	Allmendinger	Site PI 16
1139	319.076	-70.0137	-19.7671	6	7	14	Allmendinger	Site PI 16
1140	2.75355	-70.038	-19.7516	6	7	14	Allmendinger	Site PI 15
1141	80.507	-70.0381	-19.7524	6	7	14	Allmendinger	Site PI 15
1142	14.219	-70.038	-19.7523	6	7	14	Allmendinger	Site PI 15
1143	349.449	-70.0381	-19.7522	6	7	14	Allmendinger	Site PI 15
1144	15.9728	-70.0381	-19.7522	6	7	14	Allmendinger	Site PI 15
1145	18.4158	-70.0381	-19.752	6	7	14	Allmendinger	Site PI 15
1146	167.006	-70.0381	-19.7519	6	7	14	Allmendinger	Site PI 15
1147	189.947	-70.038	-19.7519	6	7	14	Allmendinger	Site PI 15
1148	179.771	-70.038	-19.7519	6	7	14	Allmendinger	Site PI 15
1149	194.268	-70.0381	-19.7519	6	7	14	Allmendinger	Site PI 15
1150	175.658	-70.038	-19.7519	6	7	14	Allmendinger	Site PI 15
1151	151.741	-70.038	-19.752	6	7	14	Allmendinger	Site PI 15
1152	349.716	-70.038	-19.752	6	7	14	Allmendinger	Site PI 15
1153	10.7369	-70.038	-19.752	6	7	14	Allmendinger	Site PI 15
1154	167.428	-70.038	-19.752	6	7	14	Allmendinger	Site PI 15
1155	179.978	-70.038	-19.752	6	7	14	Allmendinger	Site PI 15
1156	4.62889	-70.038	-19.7521	6	7	14	Allmendinger	Site PI 15
1157	179.445	-70.038	-19.7521	6	7	14	Allmendinger	Site PI 15
1158	355.722	-70.038	-19.7521	6	7	14	Allmendinger	Site PI 15
1159	263.45	-70.0681	-19.7158	6	7	14	Allmendinger	Site PI 14
1160	272.198	-70.0685	-19.7158	6	7	14	Allmendinger	Site PI 14
1161	277.788	-70.0685	-19.7157	6	7	14	Allmendinger	Site PI 14
1162	276.835	-70.0685	-19.7158	6	7	14	Allmendinger	Site PI 14
1163	267.021	-70.0687	-19.7157	6	7	14	Allmendinger	Site PI 14
1164	278.606	-70.0687	-19.7157	6	7	14	Allmendinger	Site PI 14
1165	269.36	-70.0688	-19.7157	6	7	14	Allmendinger	Site PI 14
1166	269.19	-70.0688	-19.7157	6	7	14	Allmendinger	Site PI 14
1167	110.377	-70.0689	-19.7157	6	7	14	Allmendinger	Site PI 14
1168	270.378	-70.0689	-19.7157	6	7	14	Allmendinger	Site PI 14
1169	288.726	-70.0689	-19.7157	6	7	14	Allmendinger	Site PI 14
1170	110.124	-70.0689	-19.7155	6	7	14	Allmendinger	Site PI 14
1171	298.751	-70.0689	-19.7154	6	7	14	Allmendinger	Site PI 14
1172	104.629	-70.0688	-19.7154	6	7	14	Allmendinger	Site PI 14
1173	293.681	-70.0688	-19.7154	6	7	14	Allmendinger	Site PI 14
1174	108.266	-70.0688	-19.7154	6	7	14	Allmendinger	Site PI 14
1175	93.8334	-70.0686	-19.7155	6	7	14	Allmendinger	Site PI 14
1176	81.1416	-70.0684	-19.7155	6	7	14	Allmendinger	Site PI 14
1177	106.528	-70.0684	-19.7155	6	7	14	Allmendinger	Site PI 14
1178	95.1808	-70.0684	-19.7156	6	7	14	Allmendinger	Site PI 14
1179	67.0021	-70.0683	-19.7156	6	7	14	Allmendinger	Site PI 14
1180	102.214	-70.0683	-19.7157	6	7	14	Allmendinger	Site PI 14
1181	292.202	-70.0683	-19.7157	6	7	14	Allmendinger	Site PI 14
1182	97.7748	-70.0683	-19.7157	6	7	14	Allmendinger	Site PI 14
1183	295.48	-70.0683	-19.7158	6	7	14	Allmendinger	Site PI 14
1184	292.451	-70.0683	-19.7158	6	7	14	Allmendinger	Site PI 14
1185	292.995	-70.0683	-19.7158	6	7	14	Allmendinger	Site PI 14
1186	92.4825	-70.0683	-19.7158	6	7	14	Allmendinger	Site PI 14
1187	276.474	-70.0683	-19.7158	6	7	14	Allmendinger	Site PI 14
1188	108.054	-70.0683	-19.7158	6	7	14	Allmendinger	Site PI 14
1189	347.712	-70.0176	-19.7549	5	7	14	Allmendinger	Site PI 13
1190	141.338	-70.0177	-19.7545	5	7	14	Allmendinger	Site PI 13
1191	149.915	-70.0177	-19.7544	5	7	14	Allmendinger	Site PI 13
1192	335.753	-70.0177	-19.7542	5	7	14	Allmendinger	Site PI 13
1193	328.866	-70.0177	-19.7541	5	7	14	Allmendinger	Site PI 13
1194	163.86	-70.0176	-19.7541	5	7	14	Allmendinger	Site PI 13
1195	337.187	-70.0177	-19.7538	5	7	14	Allmendinger	Site PI 13
1196	340.501	-70.0177	-19.7537	5	7	14	Allmendinger	Site PI 13
1197	358.808	-70.0177	-19.7537	5	7	14	Allmendinger	Site PI 13
1198	338.035	-70.0179	-19.7536	5	7	14	Allmendinger	Site PI 13
1199	356.301	-70.0179	-19.7536	5	7	14	Allmendinger	Site PI 13
1200	350.076	-70.0179	-19.7536	5	7	14	Allmendinger	Site PI 13
1201	71.6007	-70.018	-19.7533	5	7	14	Allmendinger	Site PI 13
1202	104.85	-70.0177	-19.7531	5	7	14	Allmendinger	Site PI 13
1203	198.79	-70.0177	-19.7531	5	7	14	Allmendinger	Site PI 13
1204	183.731	-70.0177	-19.7532	5	7	14	Allmendinger	Site PI 13
1205	175.529	-70.0177	-19.7534	5	7	14	Allmendinger	Site PI 13
1206	341.958	-70.0177	-19.7535	5	7	14	Allmendinger	Site PI 13
1207	125.823	-70.0176	-19.7536	5	7	14	Allmendinger	Site PI 13
1208	160.08	-70.0175	-19.7536	5	7	14	Allmendinger	Site PI 13
1209	2.714	-70.0176	-19.7537	5	7	14	Allmendinger	Site PI 13
1210	334.642	-70.0176	-19.7537	5	7	14	Allmendinger	Site PI 13
1211	331.2	-70.0176	-19.7537	5	7	14	Allmendinger	Site PI 13
1212	11.9744	-70.0177	-19.7537	5	7	14	Allmendinger	Site PI 13
1213	141.729	-70.0177	-19.7537	5	7	14	Allmendinger	Site PI 13
1214	339.69	-70.0177	-19.7537	5	7	14	Allmendinger	Site PI 13
1215	353.248	-70.0179	-19.7537	5	7	14	Allmendinger	Site PI 13
1216	1.90686	-70.0179	-19.7537	5	7	14	Allmendinger	Site PI 13
1217	13.7455	-70.0179	-19.7537	5	7	14	Allmendinger	Site PI 13
1218	179.123	-70.0179	-19.7537	5	7	14	Allmendinger	Site PI 13
1219	336.31	-70.0181	-19.7544	5	7	14	Allmendinger	Site PI 13
1220	319.936	-70.0179	-19.7544	5	7	14	Allmendinger	Site PI 13
1221	324.423	-70.0178	-19.7545	5	7	14	Allmendinger	Site PI 13
1222	323.682	-70.0175	-19.7547	5	7	14	Allmendinger	Site PI 13
1223	203.397	-70.0174	-19.7548	5	7	14	Allmendinger	Site PI 13
1224	340.56	-70.0176	-19.755	5	7	14	Allmendinger	Site PI 13
1225	261.436	-70.0176	-19.755	5	7	14	Allmendinger	Site PI 13
1226	338.934	-70.0176	-19.7551	5	7	14	Allmendinger	Site PI 13
1227	3.70837	-70.0175	-19.7551	5	7	14	Allmendinger	Site PI 13
1228	215.855	-70.0175	-19.7551	5	7	14	Allmendinger	Site PI 13
1229	277.21	-70.0175	-19.7552	5	7	14	Allmendinger	Site PI 13
1230	157.752	-70.0174	-19.7552	5	7	14	Allmendinger	Site PI 13
1231	26.7864	-70.0208	-19.7575	5	7	14	Allmendinger	Site PI 13
1232	220.638	-70.021	-19.7575	5	7	14	Allmendinger	Site PI 13
1233	224.004	-70.0212	-19.7575	5	7	14	Allmendinger	Site PI 13
1234	226.753	-70.0213	-19.7575	5	7	14	Allmendinger	Site PI 13
1235	18.7794	-70.0213	-19.7574	5	7	14	Allmendinger	Site PI 13
1236	336.154	-70.0213	-19.7574	5	7	14	Allmendinger	Site PI 13
1237	17.5927	-70.0212	-19.7573	5	7	14	Allmendinger	Site PI 13
1238	342.838	-70.0211	-19.7574	5	7	14	Allmendinger	Site PI 13
1239	210.857	-70.0211	-19.7574	5	7	14	Allmendinger	Site PI 13
1240	205.044	-70.0211	-19.7574	5	7	14	Allmendinger	Site PI 13
1241	32.6433	-70.0211	-19.7575	5	7	14	Allmendinger	Site PI 13
1242	76.7	-70.0848	-19.7636	5	7	14	Allmendinger	Site PI 12
1243	146.24	-70.0848	-19.7636	5	7	14	Allmendinger	Site PI 12
1244	50.0761	-70.0845	-19.7638	5	7	14	Allmendinger	Site PI 12
1245	36.1689	-70.0845	-19.7638	5	7	14	Allmendinger	Site PI 12
1246	359.04	-70.0845	-19.7638	5	7	14	Allmendinger	Site PI 12
1247	60.6901	-70.0844	-19.7638	5	7	14	Allmendinger	Site PI 12
1248	52.1018	-70.0844	-19.7638	5	7	14	Allmendinger	Site PI 12
1249	347.049	-70.0843	-19.7638	5	7	14	Allmendinger	Site PI 12
1250	345.4	-70.0843	-19.7638	5	7	14	Allmendinger	Site PI 12
1251	343.291	-70.0843	-19.7638	5	7	14	Allmendinger	Site PI 12
1252	326.149	-70.0842	-19.7638	5	7	14	Allmendinger	Site PI 12
1253	41.9432	-70.0839	-19.7637	5	7	14	Allmendinger	Site PI 12
1254	243.711	-70.0838	-19.7637	5	7	14	Allmendinger	Site PI 12
1255	296.905	-70.0838	-19.7637	5	7	14	Allmendinger	Site PI 12
1256	356.314	-70.0838	-19.7638	5	7	14	Allmendinger	Site PI 12
1257	328.49	-70.0836	-19.7637	5	7	14	Allmendinger	Site PI 12
1258	66.6361	-70.0836	-19.7637	5	7	14	Allmendinger	Site PI 12
1259	279.459	-70.0836	-19.7637	5	7	14	Allmendinger	Site PI 12
1260	305.67	-70.0837	-19.7636	5	7	14	Allmendinger	Site PI 12
1261	44.1795	-70.0837	-19.7636	5	7	14	Allmendinger	Site PI 12
1262	305.884	-70.0837	-19.7636	5	7	14	Allmendinger	Site PI 12
1263	36.3939	-70.0838	-19.7636	5	7	14	Allmendinger	Site PI 12
1264	109.972	-70.0838	-19.7636	5	7	14	Allmendinger	Site PI 12
1265	15.7525	-70.0838	-19.7636	5	7	14	Allmendinger	Site PI 12
1266	286.02	-70.0839	-19.7636	5	7	14	Allmendinger	Site PI 12
1267	231.833	-70.0839	-19.7636	5	7	14	Allmendinger	Site PI 12
1268	107.374	-70.084	-19.7636	5	7	14	Allmendinger	Site PI 12
1269	226.221	-70.084	-19.7636	5	7	14	Allmendinger	Site PI 12
1270	286.704	-70.084	-19.7636	5	7	14	Allmendinger	Site PI 12
1271	269.445	-70.0841	-19.7637	5	7	14	Allmendinger	Site PI 12
1272	312.357	-70.0841	-19.7637	5	7	14	Allmendinger	Site PI 12
1273	311.665	-70.0841	-19.7637	5	7	14	Allmendinger	Site PI 12
1274	124.928	-70.0842	-19.7637	5	7	14	Allmendinger	Site PI 12
1275	50.3947	-70.0842	-19.7637	5	7	14	Allmendinger	Site PI 12
1276	359.912	-70.0842	-19.7637	5	7	14	Allmendinger	Site PI 12
1277	199.5	-70.0842	-19.7637	5	7	14	Allmendinger	Site PI 12
1278	46.8807	-70.0842	-19.7637	5	7	14	Allmendinger	Site PI 12
1279	243.181	-70.0842	-19.7636	5	7	14	Allmendinger	Site PI 12
1280	6.95963	-70.0842	-19.7636	5	7	14	Allmendinger	Site PI 12
1281	232.429	-70.0842	-19.7636	5	7	14	Allmendinger	Site PI 12
1282	110.9	-70.0843	-19.7635	5	7	14	Allmendinger	Site PI 12
1283	14.9	-70.0682	-19.7619	5	7	14	Allmendinger	Site PI 11
1284	95.9	-70.069	-19.7627	5	7	14	Allmendinger	Site PI 11
1285	282.8	-70.0691	-19.763	5	7	14	Allmendinger	Site PI 11
1286	176.9	-70.0689	-19.763	5	7	14	Allmendinger	Site PI 11
1287	7.8	-70.0687	-19.7628	5	7	14	Allmendinger	Site PI 11
1288	11.9	-70.0687	-19.7632	5	7	14	Allmendinger	Site PI 11
1289	269.1	-70.0684	-19.7632	5	7	14	Allmendinger	Site PI 11
1290	91.3	-70.0684	-19.7634	5	7	14	Allmendinger	Site PI 11
1291	26.2917	-70.0676	-19.7631	5	7	14	Allmendinger	Site PI 11; ??
1292	5.8	-70.0675	-19.7634	5	7	14	Allmendinger	Site PI 11
1293	186	-70.0667	-19.7632	5	7	14	Allmendinger	Site PI 11
1294	181.6	-70.0667	-19.7632	5	7	14	Allmendinger	Site PI 11
1295	354.491	-70.0667	-19.7632	5	7	14	Allmendinger	Site PI 11
1296	19.6	-70.0667	-19.7632	5	7	14	Allmendinger	Site PI 11
1297	14.9407	-70.0667	-19.7632	5	7	14	Allmendinger	Site PI 11
1298	340.959	-70.0667	-19.7632	5	7	14	Allmendinger	Site PI 11
1299	9.04427	-70.0667	-19.7632	5	7	14	Allmendinger	Site PI 11
1300	173.5	-70.0667	-19.7632	5	7	14	Allmendinger	Site PI 11
1301	349.19	-70.0667	-19.7632	5	7	14	Allmendinger	Site PI 11
1302	155.3	-70.0666	-19.7632	5	7	14	Allmendinger	Site PI 11
1303	168.5	-70.0666	-19.7631	5	7	14	Allmendinger	Site PI 11
1304	343.7	-70.0723	-19.7557	5	7	14	Allmendinger	Site PI 10
1305	7.51875	-70.0723	-19.7556	5	7	14	Allmendinger	Site PI 10
1306	355.683	-70.0724	-19.7556	5	7	14	Allmendinger	Site PI 10
1307	351.765	-70.0728	-19.7558	5	7	14	Allmendinger	Site PI 10
1308	306.2	-70.0737	-19.7561	5	7	14	Allmendinger	Site PI 10
1309	272.421	-70.0738	-19.7562	5	7	14	Allmendinger	Site PI 10
1310	256.6	-70.0733	-19.7562	5	7	14	Allmendinger	Site PI 10
1311	169.8	-70.0733	-19.7562	5	7	14	Allmendinger	Site PI 10
1312	150.236	-70.0727	-19.7563	5	7	14	Allmendinger	Site PI 10
1313	15.6	-70.0726	-19.7562	5	7	14	Allmendinger	Site PI 10
1314	343.3	-70.0726	-19.7562	5	7	14	Allmendinger	Site PI 10
1315	4.7	-70.0726	-19.7562	5	7	14	Allmendinger	Site PI 10
1316	358.4	-70.0725	-19.7562	5	7	14	Allmendinger	Site PI 10
1317	35.9	-70.0724	-19.7562	5	7	14	Allmendinger	Site PI 10
1318	14.9	-70.0723	-19.7562	5	7	14	Allmendinger	Site PI 10
1319	13.367	-70.0722	-19.7562	5	7	14	Allmendinger	Site PI 10
1320	358.104	-70.0719	-19.7562	5	7	14	Allmendinger	Site PI 10
1321	4.105	-70.0718	-19.7562	5	7	14	Allmendinger	Site PI 10
1322	10.094	-70.0717	-19.7561	5	7	14	Allmendinger	Site PI 10
1323	357.884	-70.0713	-19.7558	5	7	14	Allmendinger	Site PI 10
1324	168.783	-70.0714	-19.7556	5	7	14	Allmendinger	Site PI 10
1325	187.272	-70.0715	-19.7556	5	7	14	Allmendinger	Site PI 10
1326	195.7	-70.0719	-19.7516	5	7	14	Allmendinger	Site PI 10
1327	145.039	-70.072	-19.7519	5	7	14	Allmendinger	Site PI 10
1328	316.344	-70.0724	-19.7519	5	7	14	Allmendinger	Site PI 10
1329	339.96	-70.0724	-19.7518	5	7	14	Allmendinger	Site PI 10
1330	350.4	-70.0724	-19.7518	5	7	14	Allmendinger	Site PI 10
1331	294.762	-70.0724	-19.7518	5	7	14	Allmendinger	Site PI 10
1332	303.1	-70.0724	-19.7517	5	7	14	Allmendinger	Site PI 10
1333	290.8	-70.0729	-19.7515	5	7	14	Allmendinger	Site PI 10
1334	319.4	-70.0729	-19.7515	5	7	14	Allmendinger	Site PI 10
1335	335.181	-70.0533	-19.7495	5	7	14	Allmendinger	Site PI 9
1336	359.275	-70.0445	-19.7251	5	7	14	Allmendinger	Site PI 9
1337	240.268	-70.0543	-19.7501	5	7	14	Allmendinger	Site PI 9
1338	343.025	-70.0543	-19.7501	5	7	14	Allmendinger	Site PI 9
1339	85.2735	-70.0664	-19.7224	5	7	14	Allmendinger	Site PI 8
1340	273.11	-70.0664	-19.7225	5	7	14	Allmendinger	Site PI 8
1341	94.4657	-70.0664	-19.7225	5	7	14	Allmendinger	Site PI 8
1342	80.9435	-70.0663	-19.7225	5	7	14	Allmendinger	Site PI 8
1343	99.3911	-70.0662	-19.7225	5	7	14	Allmendinger	Site PI 8
1344	112.4	-70.0662	-19.7225	5	7	14	Allmendinger	Site PI 8
1345	85.1081	-70.0662	-19.7225	5	7	14	Allmendinger	Site PI 8
1346	266.065	-70.0661	-19.7225	5	7	14	Allmendinger	Site PI 8
1347	270.776	-70.0661	-19.7225	5	7	14	Allmendinger	Site PI 8
1348	276.051	-70.0661	-19.7224	5	7	14	Allmendinger	Site PI 8
1349	67.1103	-70.0662	-19.7223	5	7	14	Allmendinger	Site PI 8
1350	113.752	-70.0662	-19.7223	5	7	14	Allmendinger	Site PI 8
1351	90.3635	-70.0662	-19.7223	5	7	14	Allmendinger	Site PI 8
1352	275.584	-70.0662	-19.7223	5	7	14	Allmendinger	Site PI 8
1353	304.701	-70.0751	-19.6586	5	7	14	Allmendinger	Site PI 7
1354	306.872	-70.0758	-19.658	5	7	14	Allmendinger	Site PI 7
1355	295.598	-70.0759	-19.658	5	7	14	Allmendinger	Site PI 7
1356	297.554	-70.0759	-19.6581	5	7	14	Allmendinger	Site PI 7
1357	236.501	-70.0759	-19.6581	5	7	14	Allmendinger	Site PI 7
1358	290.306	-70.0759	-19.6581	5	7	14	Allmendinger	Site PI 7
1359	309.406	-70.0759	-19.6582	5	7	14	Allmendinger	Site PI 7
1360	34.4986	-70.0759	-19.6582	5	7	14	Allmendinger	Site PI 7
1361	112.84	-70.0756	-19.6582	5	7	14	Allmendinger	Site PI 7
1362	84.7303	-70.0755	-19.6581	5	7	14	Allmendinger	Site PI 7
1363	80.1919	-70.0755	-19.6582	5	7	14	Allmendinger	Site PI 7
1364	150.553	-70.0755	-19.6582	5	7	14	Allmendinger	Site PI 7
1365	120.662	-70.0754	-19.6583	5	7	14	Allmendinger	Site PI 7
1366	325.808	-70.0753	-19.6583	5	7	14	Allmendinger	Site PI 7
1367	311.587	-70.0754	-19.6582	5	7	14	Allmendinger	Site PI 7
1368	324.265	-70.0754	-19.6582	5	7	14	Allmendinger	Site PI 7
1369	135.738	-70.0754	-19.6581	5	7	14	Allmendinger	Site PI 7
1370	308.945	-70.0753	-19.6581	5	7	14	Allmendinger	Site PI 7
1371	324.85	-70.0753	-19.6581	5	7	14	Allmendinger	Site PI 7
1372	324.622	-70.0753	-19.6581	5	7	14	Allmendinger	Site PI 7
1373	321.835	-70.0753	-19.6581	5	7	14	Allmendinger	Site PI 7
1374	320.37	-70.0753	-19.6581	5	7	14	Allmendinger	Site PI 7
1375	334.212	-70.0752	-19.6581	5	7	14	Allmendinger	Site PI 7
1376	125.901	-70.0752	-19.658	5	7	14	Allmendinger	Site PI 7
1377	131.624	-70.0751	-19.658	5	7	14	Allmendinger	Site PI 7
1378	138.749	-70.0751	-19.658	5	7	14	Allmendinger	Site PI 7
1379	138.494	-70.075	-19.658	5	7	14	Allmendinger	Site PI 7
1380	77.9786	-70.0749	-19.658	5	7	14	Allmendinger	Site PI 7
1381	120.414	-70.0749	-19.658	5	7	14	Allmendinger	Site PI 7
1382	106.952	-70.0749	-19.658	5	7	14	Allmendinger	Site PI 7
1383	70.1363	-70.0749	-19.658	5	7	14	Allmendinger	Site PI 7
1384	131.454	-70.0749	-19.658	5	7	14	Allmendinger	Site PI 7
1385	305.159	-70.0748	-19.6579	5	7	14	Allmendinger	Site PI 7
1386	122.168	-70.0748	-19.658	5	7	14	Allmendinger	Site PI 7
1387	110.981	-70.0747	-19.658	5	7	14	Allmendinger	Site PI 7
1388	106.074	-70.0748	-19.6581	5	7	14	Allmendinger	Site PI 7
1389	327.378	-70.0748	-19.6581	5	7	14	Allmendinger	Site PI 7
1390	139.613	-70.0744	-19.6582	5	7	14	Allmendinger	Site PI 7
1391	242.565	-70.0777	-19.6583	5	7	14	Allmendinger	Site PI 7
1392	66.8548	-70.0781	-19.6582	5	7	14	Allmendinger	Site PI 7
1393	254.229	-70.078	-19.6583	5	7	14	Allmendinger	Site PI 7
1394	42.7334	-70.0784	-19.6584	5	7	14	Allmendinger	Site PI 7
1395	82.5949	-70.0785	-19.6583	5	7	14	Allmendinger	Site PI 7
1396	246.038	-70.0784	-19.6583	5	7	14	Allmendinger	Site PI 7
1397	77.9374	-70.0784	-19.6583	5	7	14	Allmendinger	Site PI 7
1398	234.036	-70.0784	-19.6582	5	7	14	Allmendinger	Site PI 7
1399	198.101	-70.1153	-19.6681	5	7	14	Allmendinger	Site PI 6
1400	211.883	-70.1145	-19.6683	5	7	14	Allmendinger	Site PI 6
1401	350.32	-70.1141	-19.6689	5	7	14	Allmendinger	Site PI 6
1402	8.43272	-70.1141	-19.6689	5	7	14	Allmendinger	Site PI 6
1403	347.292	-70.1142	-19.6689	5	7	14	Allmendinger	Site PI 6
1404	0.338051	-70.1142	-19.6689	5	7	14	Allmendinger	Site PI 6
1405	356.21	-70.1144	-19.6688	5	7	14	Allmendinger	Site PI 6
1406	327.292	-70.1144	-19.6688	5	7	14	Allmendinger	Site PI 6
1407	331.507	-70.1145	-19.6688	5	7	14	Allmendinger	Site PI 6
1408	349.785	-70.1146	-19.6688	5	7	14	Allmendinger	Site PI 6
1409	341.773	-70.1146	-19.6687	5	7	14	Allmendinger	Site PI 6
1410	11.2578	-70.1146	-19.6687	5	7	14	Allmendinger	Site PI 6
1411	358.049	-70.1146	-19.6687	5	7	14	Allmendinger	Site PI 6
1412	311.402	-70.1149	-19.6686	5	7	14	Allmendinger	Site PI 6
1413	32.1052	-70.1149	-19.6686	5	7	14	Allmendinger	Site PI 6
1414	335.365	-70.115	-19.6686	5	7	14	Allmendinger	Site PI 6
1415	14.8045	-70.115	-19.6686	5	7	14	Allmendinger	Site PI 6
1416	334.418	-70.115	-19.6686	5	7	14	Allmendinger	Site PI 6
1417	8.407	-70.1151	-19.6687	5	7	14	Allmendinger	Site PI 6
1418	109.313	-70.1151	-19.6687	5	7	14	Allmendinger	Site PI 6
1419	352.64	-70.1151	-19.6686	5	7	14	Allmendinger	Site PI 6
1420	355.849	-70.1153	-19.6687	5	7	14	Allmendinger	Site PI 6
1421	21.1592	-70.1154	-19.6687	5	7	14	Allmendinger	Site PI 6
1422	6.51031	-70.1154	-19.6687	5	7	14	Allmendinger	Site PI 6
1423	21.1105	-70.1155	-19.6686	5	7	14	Allmendinger	Site PI 6
1424	349.657	-70.1155	-19.6686	5	7	14	Allmendinger	Site PI 6
1425	347.35	-70.1155	-19.6686	5	7	14	Allmendinger	Site PI 6
1426	193.763	-70.1156	-19.6686	5	7	14	Allmendinger	Site PI 6
1427	199.433	-70.1157	-19.6685	5	7	14	Allmendinger	Site PI 6
1428	288.484	-70.1157	-19.6685	5	7	14	Allmendinger	Site PI 6
1429	18.8404	-70.1158	-19.6685	5	7	14	Allmendinger	Site PI 6
1430	1.42653	-70.1157	-19.6685	5	7	14	Allmendinger	Site PI 6
1431	347.285	-70.1159	-19.6682	5	7	14	Allmendinger	Site PI 6
1432	7.13891	-70.1159	-19.6682	5	7	14	Allmendinger	Site PI 6
1433	320.188	-70.1159	-19.6681	5	7	14	Allmendinger	Site PI 6
1434	28.3314	-70.1159	-19.6681	5	7	14	Allmendinger	Site PI 6
1435	330.989	-70.1159	-19.6681	5	7	14	Allmendinger	Site PI 6
1436	348.6	-70.1322	-19.6931	5	7	14	Allmendinger	Site PI 05; 2 mm
1437	349.152	-70.1327	-19.6935	5	7	14	Allmendinger	Site PI 05; 2 mm
1438	341.745	-70.1334	-19.6939	5	7	14	Allmendinger	Site PI 05; 2 mm
1439	125.726	-70.1333	-19.6939	5	7	14	Allmendinger	Site PI 05; 0.5 mm
1440	339.267	-70.1332	-19.6939	5	7	14	Allmendinger	Site PI 05; 2 mm
1441	41.5899	-70.1332	-19.6939	5	7	14	Allmendinger	Site PI 05; 2 mm
1442	326.484	-70.1331	-19.6939	5	7	14	Allmendinger	Site PI 05; 1 mm
1443	144.719	-70.1329	-19.6938	5	7	14	Allmendinger	Site PI 05; 1 mm
1444	337.347	-70.1326	-19.6938	5	7	14	Allmendinger	Site PI 05; 2 mm
1445	10.0646	-70.1324	-19.6937	5	7	14	Allmendinger	Site PI 05; 1 mm
1446	358.23	-70.1325	-19.6932	5	7	14	Allmendinger	Site PI 05; 1.5 mm
1447	112.327	-70.1325	-19.6932	5	7	14	Allmendinger	Site PI 05; 2 mm
1448	343.322	-70.1321	-19.693	5	7	14	Allmendinger	Site PI 05; 2 mm
1449	348.048	-70.1319	-19.6929	5	7	14	Allmendinger	Site PI 05; 2 mm
1450	350.069	-70.1317	-19.6929	5	7	14	Allmendinger	Site PI 05; 1 mm
1451	182.34	-70.1316	-19.6928	5	7	14	Allmendinger	Site PI 05; 1.5 mm
1452	357.734	-70.1315	-19.6927	5	7	14	Allmendinger	Site PI 05; 2 mm
1453	110.608	-70.1313	-19.6925	5	7	14	Allmendinger	Site PI 05; 1 mm
1454	66.9851	-70.1312	-19.6925	5	7	14	Allmendinger	Site PI 05; 1 mm
1455	186.627	-70.1311	-19.6924	5	7	14	Allmendinger	Site PI 05; 0.5 mm
1456	187.858	-70.1252	-19.691	5	7	14	Allmendinger	Site PI 05; 1 mm
1457	167.358	-70.1253	-19.6911	5	7	14	Allmendinger	Site PI 05; 2 mm
1458	358.399	-70.1254	-19.6911	5	7	14	Allmendinger	Site PI 05; 2 mm
1459	315.219	-70.1256	-19.6912	5	7	14	Allmendinger	Site PI 05
1460	354.8	-70.1256	-19.6913	5	7	14	Allmendinger	Site PI 05; 10 mm wide
1461	11.3413	-70.1257	-19.6913	5	7	14	Allmendinger	Site PI 05; 1.5 mm
1462	337.178	-70.1259	-19.6913	5	7	14	Allmendinger	Site PI 05
1463	150.469	-70.1261	-19.6913	5	7	14	Allmendinger	Site PI 05; 1 mm
1464	357.807	-70.1262	-19.6913	5	7	14	Allmendinger	Site PI 05; 1 mm
1465	158.788	-70.1263	-19.6914	5	7	14	Allmendinger	Site PI 05; 1 mm
1466	19.4246	-70.1267	-19.6915	5	7	14	Allmendinger	Site PI 05; 2 mm
1467	342.304	-70.1268	-19.6913	5	7	14	Allmendinger	Site PI 05; 1 mm
1468	206.523	-70.127	-19.6915	5	7	14	Allmendinger	Site PI 05; 1 mm
1469	153.073	-70.127	-19.6915	5	7	14	Allmendinger	Site PI 05; 1 mm
1470	339.651	-70.1272	-19.6916	5	7	14	Allmendinger	Site PI 05; 1 mm
1471	30.5205	-70.1273	-19.6916	5	7	14	Allmendinger	Site PI 05; 0.5 mm
1472	5.94544	-70.1274	-19.6916	5	7	14	Allmendinger	Site PI 05; 1.5 mm
1473	230.286	-70.1275	-19.6916	5	7	14	Allmendinger	Site PI 05; 0.5 mm
1474	325.837	-70.1275	-19.6917	5	7	14	Allmendinger	Site PI 05; 0.5 mm
1475	353.163	-70.1276	-19.6917	5	7	14	Allmendinger	Site PI 05; 1 mm
1476	17.6515	-70.1277	-19.6917	5	7	14	Allmendinger	Site PI 05; 0.5 mm
1477	327.924	-70.1279	-19.6916	5	7	14	Allmendinger	Site PI 05; 0.5 mm
1478	222.92	-70.1281	-19.6917	5	7	14	Allmendinger	Site PI 05; 2 mm
1479	4.05701	-70.1282	-19.6918	5	7	14	Allmendinger	Site PI 05; 2 mm
1480	353.051	-70.1283	-19.6917	5	7	14	Allmendinger	Site PI 05; 1 mm
1481	324.123	-70.1286	-19.6917	5	7	14	Allmendinger	Site PI 05; 1 mm
1482	356.606	-70.1286	-19.6918	5	7	14	Allmendinger	Site PI 05; 1 mm
1483	357.11	-70.1289	-19.6918	5	7	14	Allmendinger	Site PI 05; 3 mm
1484	351.008	-70.1292	-19.6919	5	7	14	Allmendinger	Site PI 05; 3 mm
1485	356.48	-70.1292	-19.6918	5	7	14	Allmendinger	Site PI 05; 1 mm
1486	342.849	-70.1295	-19.692	5	7	14	Allmendinger	Site PI 05; 3 mm
1487	16.1739	-70.1296	-19.692	5	7	14	Allmendinger	Site PI 05; 2 mm
1488	312.867	-70.1299	-19.6919	5	7	14	Allmendinger	Site PI 05; 1.5 mm
1489	358.785	-70.1299	-19.6919	5	7	14	Allmendinger	Site PI 05; 1.5 mm
1490	354.309	-70.1302	-19.692	5	7	14	Allmendinger	Site PI 05; 2 mm
1491	179.103	-70.1302	-19.6922	5	7	14	Allmendinger	Site PI 05; 1 mm
1492	329.497	-70.1304	-19.6919	5	7	14	Allmendinger	Site PI 05; 1 mm
1493	7.96037	-70.1305	-19.692	5	7	14	Allmendinger	Site PI 05; 1 mm
1494	321.938	-70.1305	-19.692	5	7	14	Allmendinger	Site PI 05; 1 mm
1495	40.8151	-70.1306	-19.6919	5	7	14	Allmendinger	Site PI 05; 3 mm
1496	352.291	-70.1306	-19.692	5	7	14	Allmendinger	Site PI 05; 1 mm
1497	343.513	-70.1307	-19.692	5	7	14	Allmendinger	Site PI 05; 1 mm
1498	206.391	-70.1307	-19.6922	5	7	14	Allmendinger	Site PI 05; 1 mm
1499	348.537	-70.1308	-19.6922	5	7	14	Allmendinger	Site PI 05; 1 mm
1500	147.296	-70.131	-19.6922	5	7	14	Allmendinger	Site PI 05; 3 mm
1501	234.339	-70.1309	-19.6922	5	7	14	Allmendinger	Site PI 05; 1 mm
1502	141.853	-70.1309	-19.6922	5	7	14	Allmendinger	Site PI 05; 2 mm
1503	233.228	-70.1309	-19.6922	5	7	14	Allmendinger	Site PI 05; 2 mm
1504	326.89	-70.1309	-19.6923	5	7	14	Allmendinger	Site PI 05
1505	3.9	-70.1309	-19.6924	5	7	14	Allmendinger	Site PI 05; 1 mm
1506	358.807	-70.1309	-19.6924	5	7	14	Allmendinger	Site PI 05
1507	357.368	-70.1309	-19.6924	5	7	14	Allmendinger	Site PI 05
1508	55.8859	-70.131	-19.6924	5	7	14	Allmendinger	Site PI 05
1509	175.074	-70.131	-19.6924	5	7	14	Allmendinger	Site PI 05; 1 mm
1510	354.1	-70.1312	-19.6922	5	7	14	Allmendinger	Site PI 05
1511	241.7	-70.1312	-19.6922	5	7	14	Allmendinger	Site PI 05
1512	166.8	-70.1312	-19.6923	5	7	14	Allmendinger	Site PI 05
1513	352.4	-70.1312	-19.6923	5	7	14	Allmendinger	Site PI 05
1514	213.1	-70.1049	-19.5996	4	7	14	Allmendinger	Site PI 04
1515	208.5	-70.1049	-19.5996	4	7	14	Allmendinger	Site PI 04
1516	38.6	-70.1049	-19.5996	4	7	14	Allmendinger	Site PI 04
1517	27.8	-70.1049	-19.5996	4	7	14	Allmendinger	Site PI 04
1518	20.3	-70.1049	-19.5996	4	7	14	Allmendinger	Site PI 04
1519	21.5	-70.1049	-19.5996	4	7	14	Allmendinger	Site PI 04
1520	30.2	-70.1049	-19.5996	4	7	14	Allmendinger	Site PI 04
1521	39.2	-70.1049	-19.5996	4	7	14	Allmendinger	Site PI 04
1522	203.2	-70.1049	-19.5996	4	7	14	Allmendinger	Site PI 04
1523	21.9	-70.105	-19.5995	4	7	14	Allmendinger	Site PI 04
1524	192.4	-70.105	-19.5995	4	7	14	Allmendinger	Site PI 04
1525	26.9	-70.1054	-19.5994	4	7	14	Allmendinger	Site PI 04
1526	197.3	-70.1055	-19.5993	4	7	14	Allmendinger	Site PI 04
1527	202.5	-70.1055	-19.5993	4	7	14	Allmendinger	Site PI 04
1528	196.8	-70.1055	-19.5993	4	7	14	Allmendinger	Site PI 04
1529	190.7	-70.1055	-19.5993	4	7	14	Allmendinger	Site PI 04
1530	219.2	-70.1055	-19.5993	4	7	14	Allmendinger	Site PI 04
1531	203	-70.1055	-19.5994	4	7	14	Allmendinger	Site PI 04
1532	206.3	-70.1054	-19.5994	4	7	14	Allmendinger	Site PI 04
1533	211.8	-70.1054	-19.5994	4	7	14	Allmendinger	Site PI 04
1534	201.4	-70.1054	-19.5994	4	7	14	Allmendinger	Site PI 04
1535	227.6	-70.1068	-19.5978	4	7	14	Allmendinger	Site PI 04
1536	44.3	-70.1068	-19.5978	4	7	14	Allmendinger	Site PI 04
1537	336.2	-70.107	-19.5977	4	7	14	Allmendinger	Site PI 04
1538	137.6	-70.107	-19.5977	4	7	14	Allmendinger	Site PI 04
1539	79.3	-70.107	-19.5977	4	7	14	Allmendinger	Site PI 04
1540	104.1	-70.107	-19.5977	4	7	14	Allmendinger	Site PI 04
1541	239.3	-70.1071	-19.5978	4	7	14	Allmendinger	Site PI 04
1542	107.1	-70.107	-19.5978	4	7	14	Allmendinger	Site PI 04
1543	59.9036	-70.107	-19.5978	4	7	14	Allmendinger	Site PI 04
1544	42.8706	-70.107	-19.5979	4	7	14	Allmendinger	Site PI 04
1545	98.0433	-70.107	-19.5979	4	7	14	Allmendinger	Site PI 04
1546	59.7108	-70.107	-19.5979	4	7	14	Allmendinger	Site PI 04
1547	114.687	-70.107	-19.598	4	7	14	Allmendinger	Site PI 04
1548	52.684	-70.1069	-19.598	4	7	14	Allmendinger	Site PI 04
1549	60.5	-70.1069	-19.598	4	7	14	Allmendinger	Site PI 04
1550	226.412	-70.1069	-19.598	4	7	14	Allmendinger	Site PI 04
1551	76.7552	-70.1069	-19.598	4	7	14	Allmendinger	Site PI 04
1552	131.902	-70.1069	-19.598	4	7	14	Allmendinger	Site PI 04
1553	107.273	-70.1069	-19.5981	4	7	14	Allmendinger	Site PI 04
1554	150.498	-70.1068	-19.5982	4	7	14	Allmendinger	Site PI 04
1555	80.2951	-70.1068	-19.5978	4	7	14	Allmendinger	Site PI 04
1556	81.7439	-70.1068	-19.5978	4	7	14	Allmendinger	Site PI 04
1557	306.688	-70.1068	-19.5978	4	7	14	Allmendinger	Site PI 04
1558	251.44	-70.1068	-19.5978	4	7	14	Allmendinger	Site PI 04
1559	155.254	-70.1068	-19.5978	4	7	14	Allmendinger	Site PI 04
1560	259.5	-70.1068	-19.5978	4	7	14	Allmendinger	Site PI 04
1561	105.972	-70.1068	-19.5978	4	7	14	Allmendinger	Site PI 04
1562	264.323	-70.1068	-19.5978	4	7	14	Allmendinger	Site PI 04
1563	142.612	-70.1068	-19.5978	4	7	14	Allmendinger	Site PI 04
1564	269.738	-70.1068	-19.5978	4	7	14	Allmendinger	Site PI 04
1565	95	-70.1068	-19.5978	4	7	14	Allmendinger	Site PI 04
1566	69.9	-70.0564	-19.5822	4	7	14	Allmendinger	Site PI 03
1567	355.55	-70.0551	-19.5816	4	7	14	Allmendinger	Site PI 03
1568	325.754	-70.055	-19.5816	4	7	14	Allmendinger	Site PI 03
1569	123.886	-70.0547	-19.5815	4	7	14	Allmendinger	Site PI 03
1570	148.587	-70.0505	-19.5836	4	7	14	Allmendinger	Site PI 03
1571	337.777	-70.0551	-19.5819	4	7	14	Allmendinger	Site PI 03
1572	128.836	-70.0551	-19.5819	4	7	14	Allmendinger	Site PI 03
1573	153.032	-70.0554	-19.582	4	7	14	Allmendinger	Site PI 03
1574	106.7	-70.0559	-19.5821	4	7	14	Allmendinger	Site PI 03
1575	291.5	-70.0561	-19.5822	4	7	14	Allmendinger	Site PI 03
1576	134.729	-70.0562	-19.5822	4	7	14	Allmendinger	Site PI 03
1577	137.296	-70.0564	-19.5823	4	7	14	Allmendinger	Site PI 03
1578	137.631	-70.0565	-19.5824	4	7	14	Allmendinger	Site PI 03
1579	280.52	-70.0567	-19.5825	4	7	14	Allmendinger	Site PI 03
1580	343.532	-70.0569	-19.5827	4	7	14	Allmendinger	Site PI 03
1581	330.424	-70.0569	-19.5827	4	7	14	Allmendinger	Site PI 03
1582	147.4	-70.057	-19.5828	4	7	14	Allmendinger	Site PI 03
1583	11.1	-70.0265	-19.5689	4	7	14	Allmendinger	Site PI 02
1584	189.017	-70.0265	-19.5689	4	7	14	Allmendinger	Site PI 02
1585	177.69	-70.0265	-19.5688	4	7	14	Allmendinger	Site PI 02
1586	188.327	-70.0265	-19.5688	4	7	14	Allmendinger	Site PI 02
1587	12.4	-70.0265	-19.5688	4	7	14	Allmendinger	Site PI 02
1588	192.403	-70.0266	-19.5689	4	7	14	Allmendinger	Site PI 02
1589	191.841	-70.0266	-19.5689	4	7	14	Allmendinger	Site PI 02
1590	171.428	-70.0266	-19.569	4	7	14	Allmendinger	Site PI 02
1591	174.666	-70.0266	-19.569	4	7	14	Allmendinger	Site PI 02
1592	168.767	-70.0265	-19.569	4	7	14	Allmendinger	Site PI 02
1593	175.524	-70.0265	-19.5689	4	7	14	Allmendinger	Site PI 02
1594	347.141	-70.0265	-19.569	4	7	14	Allmendinger	Site PI 02
1595	165.729	-70.0265	-19.5689	4	7	14	Allmendinger	Site PI 02
1596	158.681	-70.0264	-19.5689	4	7	14	Allmendinger	Site PI 02
1597	195.575	-70.0264	-19.5689	4	7	14	Allmendinger	Site PI 02
1598	172.815	-70.0264	-19.5689	4	7	14	Allmendinger	Site PI 02
1599	179.518	-70.0264	-19.569	4	7	14	Allmendinger	Site PI 02
1600	353.636	-70.0264	-19.569	4	7	14	Allmendinger	Site PI 02
1601	168.814	-70.0265	-19.569	4	7	14	Allmendinger	Site PI 02
1602	167.138	-70.0264	-19.569	4	7	14	Allmendinger	Site PI 02
1603	173.554	-70.0264	-19.569	4	7	14	Allmendinger	Site PI 02
1604	197.589	-70.0264	-19.569	4	7	14	Allmendinger	Site PI 02
1605	188.976	-70.0264	-19.5691	4	7	14	Allmendinger	Site PI 02
1606	197.594	-70.0264	-19.5691	4	7	14	Allmendinger	Site PI 02
1607	13.9367	-70.0264	-19.5691	4	7	14	Allmendinger	Site PI 02
1608	351.665	-70.0264	-19.5691	4	7	14	Allmendinger	Site PI 02
1609	19.6298	-70.0264	-19.5691	4	7	14	Allmendinger	Site PI 02
1610	20.4733	-70.0263	-19.5691	4	7	14	Allmendinger	Site PI 02
1611	2.41953	-70.0263	-19.5692	4	7	14	Allmendinger	Site PI 02
1612	0.265999	-70.0263	-19.5691	4	7	14	Allmendinger	Site PI 02
1613	343.63	-70.0263	-19.5691	4	7	14	Allmendinger	Site PI 02
1614	181.159	-70.0263	-19.5691	4	7	14	Allmendinger	Site PI 02
1615	7.29446	-70.0262	-19.5692	4	7	14	Allmendinger	Site PI 02
1616	352.447	-70.0262	-19.5691	4	7	14	Allmendinger	Site PI 02
1617	52.2742	-70.0262	-19.5692	4	7	14	Allmendinger	Site PI 02
1618	16.4858	-70.0262	-19.5692	4	7	14	Allmendinger	Site PI 02
1619	19.0972	-70.0262	-19.5692	4	7	14	Allmendinger	Site PI 02
1620	10.3842	-70.0262	-19.5693	4	7	14	Allmendinger	Site PI 02
1621	3.74178	-70.0262	-19.5693	4	7	14	Allmendinger	Site PI 02
1622	203.889	-70.0262	-19.5693	4	7	14	Allmendinger	Site PI 02
1623	359.826	-70.0262	-19.5694	4	7	14	Allmendinger	Site PI 02
1624	88.087	-70.0263	-19.5695	4	7	14	Allmendinger	Site PI 02
1625	198.247	-70.0263	-19.5695	4	7	14	Allmendinger	Site PI 02
1626	15.8347	-70.0263	-19.5695	4	7	14	Allmendinger	Site PI 02
1627	172.194	-70.0263	-19.5695	4	7	14	Allmendinger	Site PI 02
1628	180.321	-70.0263	-19.5695	4	7	14	Allmendinger	Site PI 02
1629	347.211	-70.0263	-19.5695	4	7	14	Allmendinger	Site PI 02
1630	10.7118	-70.0263	-19.5695	4	7	14	Allmendinger	Site PI 02
1631	9.12306	-70.0263	-19.5695	4	7	14	Allmendinger	Site PI 02
1632	19.8596	-70.0263	-19.5694	4	7	14	Allmendinger	Site PI 02
1633	2.11858	-70.0263	-19.5694	4	7	14	Allmendinger	Site PI 02
1634	7.38797	-70.0263	-19.5694	4	7	14	Allmendinger	Site PI 02
1635	11.4709	-70.0263	-19.5694	4	7	14	Allmendinger	Site PI 02
1636	181.85	-70.0263	-19.5694	4	7	14	Allmendinger	Site PI 02
1637	176	-70.0263	-19.5694	4	7	14	Allmendinger	Site PI 02
1638	17.2522	-70.0263	-19.5693	4	7	14	Allmendinger	Site PI 02
1639	17.6238	-70.0262	-19.5693	4	7	14	Allmendinger	Site PI 02
1640	4.83381	-70.0263	-19.5693	4	7	14	Allmendinger	Site PI 02
1641	5.73292	-70.0263	-19.5692	4	7	14	Allmendinger	Site PI 02
1642	16.7421	-70.0263	-19.5692	4	7	14	Allmendinger	Site PI 02
1643	1.42941	-70.0263	-19.5693	4	7	14	Allmendinger	Site PI 02
1644	357.115	-70.0263	-19.5693	4	7	14	Allmendinger	Site PI 02
1645	353.73	-70.0264	-19.5693	4	7	14	Allmendinger	Site PI 02
1646	169.658	-70.0263	-19.5693	4	7	14	Allmendinger	Site PI 02
1647	174.12	-70.0263	-19.5693	4	7	14	Allmendinger	Site PI 02
1648	18.3	-70.0264	-19.5693	4	7	14	Allmendinger	Site PI 02
1649	196.2	-70.0264	-19.5693	4	7	14	Allmendinger	Site PI 02
1650	188.364	-70.0264	-19.5693	4	7	14	Allmendinger	Site PI 02
1651	203.1	-70.0264	-19.5693	4	7	14	Allmendinger	Site PI 02
1652	277.1	-70.013	-19.5562	4	7	14	Allmendinger	Site PI 01
1653	73.498	-70.0128	-19.5566	4	7	14	Allmendinger	Site PI 01
1654	18.9335	-70.0126	-19.5564	4	7	14	Allmendinger	Site PI 01
1655	133.6	-70.0126	-19.5565	4	7	14	Allmendinger	Site PI 01
1656	111.51	-70.0126	-19.5566	4	7	14	Allmendinger	Site PI 01
1657	280.834	-70.0126	-19.5568	4	7	14	Allmendinger	Site PI 01
1658	102.834	-70.0126	-19.5568	4	7	14	Allmendinger	Site PI 01
1659	90.4153	-70.0125	-19.5572	4	7	14	Allmendinger	Site PI 01
1660	71.3164	-70.0124	-19.5574	4	7	14	Allmendinger	Site PI 01
1661	6.48329	-70.0118	-19.5575	4	7	14	Allmendinger	Site PI 01
1662	102.827	-70.0113	-19.5575	4	7	14	Allmendinger	Site PI 01
1663	9.98924	-70.0113	-19.5576	4	7	14	Allmendinger	Site PI 01
1664	159.598	-70.0111	-19.5577	4	7	14	Allmendinger	Site PI 01
1665	115.525	-70.011	-19.5575	4	7	14	Allmendinger	Site PI 01
1666	336.384	-70.0107	-19.5576	4	7	14	Allmendinger	Site PI 01
1667	108.105	-70.0102	-19.5577	4	7	14	Allmendinger	Site PI 01
1668	102.1	-70.01	-19.5574	4	7	14	Allmendinger	Site PI 01
1669	335.572	-70.0099	-19.5573	4	7	14	Allmendinger	Site PI 01
1670	90.4793	-70.0099	-19.557	4	7	14	Allmendinger	Site PI 01
1671	73.9603	-70.01	-19.5565	4	7	14	Allmendinger	Site PI 01
1672	52.5791	-70.01	-19.5564	4	7	14	Allmendinger	Site PI 01
1673	8.29068	-70.0102	-19.5565	4	7	14	Allmendinger	Site PI 01
1674	105.8	-70.0104	-19.5564	4	7	14	Allmendinger	Site PI 01
1675	265.8	-70.0104	-19.5564	4	7	14	Allmendinger	Site PI 01
1676	168.8	-70.0105	-19.5563	4	7	14	Allmendinger	Site PI 01
1677	124.2	-70.0107	-19.5563	4	7	14	Allmendinger	Site PI 01
1678	321.8	-70.0107	-19.5563	4	7	14	Allmendinger	Site PI 01
1679	117	-70.011	-19.5563	4	7	14	Allmendinger	Site PI 01
1680	87.7	-70.011	-19.5563	4	7	14	Allmendinger	Site PI 01
1681	149.5	-70.0113	-19.5561	4	7	14	Allmendinger	Site PI 01
1682	91.4	-70.0113	-19.556	4	7	14	Allmendinger	Site PI 01
1683	306.6	-70.0114	-19.5562	4	7	14	Allmendinger	Site PI 01
1684	301.2	-70.0114	-19.5563	4	7	14	Allmendinger	Site PI 01
1685	165.5	-70.0116	-19.5563	4	7	14	Allmendinger	Site PI 01
1686	117.4	-70.0115	-19.5563	4	7	14	Allmendinger	Site PI 01
1687	139.4	-70.0115	-19.5563	4	7	14	Allmendinger	Site PI 01
1688	292.5	-70.0115	-19.5563	4	7	14	Allmendinger	Site PI 01
1689	44	-70.0115	-19.5564	4	7	14	Allmendinger	Site PI 01
1690	276.1	-70.0115	-19.5564	4	7	14	Allmendinger	Site PI 01
1691	286.8	-70.0114	-19.5565	4	7	14	Allmendinger	Site PI 01
1692	287.7	-70.0114	-19.5565	4	7	14	Allmendinger	Site PI 01
1693	317.5	-70.0115	-19.5565	4	7	14	Allmendinger	Site PI 01
1694	316.5	-70.0116	-19.5565	4	7	14	Allmendinger	Site PI 01
1695	125.2	-70.0116	-19.5565	4	7	14	Allmendinger	Site PI 01
1696	129.5	-70.0117	-19.5565	4	7	14	Allmendinger	Site PI 01
1697	317	-70.0117	-19.5565	4	7	14	Allmendinger	Site PI 01
1698	38.9	-70.0118	-19.5566	4	7	14	Allmendinger	Site PI 01
1699	279.1	-70.0118	-19.5567	4	7	14	Allmendinger	Site PI 01
1700	105.5	-70.0118	-19.5567	4	7	14	Allmendinger	Site PI 01
1701	109	-70.0119	-19.5568	4	7	14	Allmendinger	Site PI 01
1702	294.8	-70.0119	-19.5569	4	7	14	Allmendinger	Site PI 01
1703	83.8	-70.012	-19.5569	4	7	14	Allmendinger	Site PI 01
1704	89	-70.0124	-19.5572	4	7	14	Allmendinger	Site PI 01
1705	100.4	-70.0123	-19.5569	4	7	14	Allmendinger	Site PI 01
1706	272.7	-70.0124	-19.5568	4	7	14	Allmendinger	Site PI 01
1707	100.1	-70.0124	-19.5566	4	7	14	Allmendinger	Site PI 01
1708	296.4	-70.0125	-19.5566	4	7	14	Allmendinger	Site PI 01
1709	293.3	-70.0125	-19.5566	4	7	14	Allmendinger	Site PI 01
1710	124.8	-70.0124	-19.5564	4	7	14	Allmendinger	Site PI 01
1711	119.7	-70.0123	-19.5563	4	7	14	Allmendinger	Site PI 01
1712	109	-70.0123	-19.5562	4	7	14	Allmendinger	Site PI 01
1713	109.8	-70.0123	-19.5562	4	7	14	Allmendinger	Site PI 01
1714	99.2	-70.0122	-19.5561	4	7	14	Allmendinger	Site PI 01
1715	94.2	-70.0123	-19.5559	4	7	14	Allmendinger	Site PI 01
1716	333.3	-70.0126	-19.556	4	7	14	Allmendinger	Site PI 01
1717	77.1	-70.0126	-19.556	4	7	14	Allmendinger	Site PI 01
1718	338.9	-70.0128	-19.556	4	7	14	Allmendinger	Site PI 01
1719	277.9	-70.0128	-19.556	4	7	14	Allmendinger	Site PI 01
1720	118.4	-70.013	-19.556	4	7	14	Allmendinger	Site PI 01
1721	292.2	-70.0132	-19.556	4	7	14	Allmendinger	Site PI 01
1722	314.1	-70.0133	-19.556	4	7	14	Allmendinger	Site PI 01
1723	28.5	-70.0133	-19.556	4	7	14	Allmendinger	Site PI 01
1724	110.3	-70.0132	-19.5559	4	7	14	Allmendinger	Site PI 01
1725	164.7	-70.1189	-19.4888	3	7	14	Allmendinger	Site 22
1726	139.4	-70.119	-19.489	3	7	14	Allmendinger	Site 22
1727	138.3	-70.1189	-19.489	3	7	14	Allmendinger	Site 22
1728	140.615	-70.1187	-19.4889	3	7	14	Allmendinger	Site 22
1729	137.874	-70.1187	-19.4889	3	7	14	Allmendinger	Site 22
1730	142.479	-70.1187	-19.4889	3	7	14	Allmendinger	Site 22
1731	146.469	-70.1186	-19.4888	3	7	14	Allmendinger	Site 22
1732	156.473	-70.1186	-19.4888	3	7	14	Allmendinger	Site 22
1733	270.717	-70.1185	-19.4888	3	7	14	Allmendinger	Site 22
1734	156.709	-70.1186	-19.4887	3	7	14	Allmendinger	Site 22
1735	338.204	-70.1187	-19.4887	3	7	14	Allmendinger	Site 22
1736	123.253	-70.1189	-19.4886	3	7	14	Allmendinger	Site 22
1737	121.717	-70.1189	-19.4886	3	7	14	Allmendinger	Site 22
1738	138.788	-70.119	-19.4887	3	7	14	Allmendinger	Site 22
1739	133.28	-70.119	-19.4887	3	7	14	Allmendinger	Site 22
1740	330.883	-70.1189	-19.4887	3	7	14	Allmendinger	Site 22
1741	315.899	-70.1189	-19.4887	3	7	14	Allmendinger	Site 22
1742	326.894	-70.1189	-19.4887	3	7	14	Allmendinger	Site 22
1743	136.825	-70.1189	-19.4887	3	7	14	Allmendinger	Site 22
1744	169.722	-70.1189	-19.4888	3	7	14	Allmendinger	Site 22
1745	147.427	-70.1189	-19.4888	3	7	14	Allmendinger	Site 22
1746	322.983	-70.1191	-19.4889	3	7	14	Allmendinger	Site 22
1747	241.488	-70.1191	-19.4889	3	7	14	Allmendinger	Site 22
1748	146.192	-70.1192	-19.4889	3	7	14	Allmendinger	Site 22
1749	150.031	-70.1192	-19.4889	3	7	14	Allmendinger	Site 22
1750	61.4621	-70.1192	-19.4889	3	7	14	Allmendinger	Site 22
1751	157.631	-70.1192	-19.4889	3	7	14	Allmendinger	Site 22
1752	150.805	-70.1192	-19.4889	3	7	14	Allmendinger	Site 22
1753	126.743	-70.1192	-19.4888	3	7	14	Allmendinger	Site 22
1754	132.049	-70.1192	-19.4888	3	7	14	Allmendinger	Site 22
1755	134.933	-70.1192	-19.4888	3	7	14	Allmendinger	Site 22
1756	130.611	-70.1191	-19.4888	3	7	14	Allmendinger	Site 22
1757	157.548	-70.1192	-19.4888	3	7	14	Allmendinger	Site 22
1758	153.817	-70.1421	-19.4535	3	7	14	Allmendinger	Site 21; ???
1759	331.197	-70.1423	-19.4531	3	7	14	Allmendinger	Site 21; ??
1760	347.946	-70.1421	-19.4527	3	7	14	Allmendinger	Site 21; ??
1761	165.965	-70.1422	-19.4525	3	7	14	Allmendinger	Site 21
1762	189.512	-70.1422	-19.4525	3	7	14	Allmendinger	Site 21
1763	120.046	-70.1422	-19.4525	3	7	14	Allmendinger	Site 21; Scarp parallel
1764	353.675	-70.1422	-19.4523	3	7	14	Allmendinger	Site 21
1765	10.9383	-70.1423	-19.4522	3	7	14	Allmendinger	Site 21
1766	1.46365	-70.1422	-19.4521	3	7	14	Allmendinger	Site 21
1767	9.174	-70.1423	-19.452	3	7	14	Allmendinger	Site 21
1768	3.18847	-70.1425	-19.4519	3	7	14	Allmendinger	Site 21
1769	20.036	-70.1423	-19.4517	3	7	14	Allmendinger	Site 21
1770	187.35	-70.1421	-19.4516	3	7	14	Allmendinger	Site 21
1771	111.067	-70.1421	-19.4516	3	7	14	Allmendinger	Site 21
1772	150.482	-70.1418	-19.4516	3	7	14	Allmendinger	Site 21
1773	167.438	-70.1418	-19.4517	3	7	14	Allmendinger	Site 21
1774	170.822	-70.1416	-19.4516	3	7	14	Allmendinger	Site 21
1775	174.47	-70.1412	-19.4516	3	7	14	Allmendinger	Site 21
1776	137.193	-70.1412	-19.4518	3	7	14	Allmendinger	Site 21; In salt depression
1777	145.891	-70.1415	-19.4522	3	7	14	Allmendinger	Site 21
1778	142.109	-70.1416	-19.4524	3	7	14	Allmendinger	Site 21
1779	156.977	-70.1417	-19.4524	3	7	14	Allmendinger	Site 21
1780	173.6	-70.1417	-19.4526	3	7	14	Allmendinger	Site 21
1781	270.788	-70.1353	-19.4018	2	7	14	Allmendinger	Site 20
1782	280.76	-70.1353	-19.4019	2	7	14	Allmendinger	Site 20
1783	282.952	-70.1358	-19.4023	2	7	14	Allmendinger	Site 20
1784	280.53	-70.1358	-19.4023	2	7	14	Allmendinger	Site 20
1785	283.324	-70.1359	-19.4022	2	7	14	Allmendinger	Site 20
1786	297.939	-70.1358	-19.4021	2	7	14	Allmendinger	Site 20
1787	283.269	-70.1357	-19.4019	2	7	14	Allmendinger	Site 20
1788	288.742	-70.1356	-19.4017	2	7	14	Allmendinger	Site 20
1789	79.6773	-70.1356	-19.4016	2	7	14	Allmendinger	Site 20
1790	153.491	-70.1356	-19.4016	2	7	14	Allmendinger	Site 20
1791	332.981	-70.1357	-19.4016	2	7	14	Allmendinger	Site 20
1792	83.1719	-70.1358	-19.4017	2	7	14	Allmendinger	Site 20
1793	255.651	-70.1359	-19.4017	2	7	14	Allmendinger	Site 20
1794	286.298	-70.1358	-19.4017	2	7	14	Allmendinger	Site 20
1795	99.0927	-70.1359	-19.4019	2	7	14	Allmendinger	Site 20
1796	295.843	-70.1359	-19.402	2	7	14	Allmendinger	Site 20
1797	107.077	-70.136	-19.4021	2	7	14	Allmendinger	Site 20
1798	287.018	-70.1366	-19.4022	2	7	14	Allmendinger	Site 20
1799	322.792	-70.1363	-19.4021	2	7	14	Allmendinger	Site 20
1800	287.544	-70.1361	-19.4018	2	7	14	Allmendinger	Site 20
1801	106.917	-70.1361	-19.4017	2	7	14	Allmendinger	Site 20
1802	296.748	-70.1361	-19.4016	2	7	14	Allmendinger	Site 20
1803	287.031	-70.1362	-19.4016	2	7	14	Allmendinger	Site 20
1804	301.079	-70.1363	-19.4016	2	7	14	Allmendinger	Site 20
1805	285.957	-70.1362	-19.4015	2	7	14	Allmendinger	Site 20
1806	271.497	-70.1364	-19.4015	2	7	14	Allmendinger	Site 20
1807	275.972	-70.1366	-19.4016	2	7	14	Allmendinger	Site 20
1808	114.647	-70.1368	-19.4017	2	7	14	Allmendinger	Site 20
1809	123.901	-70.1367	-19.4015	2	7	14	Allmendinger	Site 20
1810	302.279	-70.137	-19.4015	2	7	14	Allmendinger	Site 20
1811	121.424	-70.1371	-19.4015	2	7	14	Allmendinger	Site 20
1812	109.461	-70.1371	-19.4015	2	7	14	Allmendinger	Site 20
1813	117.749	-70.1382	-19.4015	2	7	14	Allmendinger	Site 20
1814	353.535	-70.1385	-19.4015	2	7	14	Allmendinger	Site 20
1815	313.095	-70.1388	-19.4018	2	7	14	Allmendinger	Site 20
1816	110.604	-70.1388	-19.4018	2	7	14	Allmendinger	Site 20
1817	152.508	-70.1388	-19.4021	2	7	14	Allmendinger	Site 20
1818	330.529	-70.1389	-19.4021	2	7	14	Allmendinger	Site 20
1819	275.115	-70.1389	-19.4022	2	7	14	Allmendinger	Site 20
1820	157.522	-70.1389	-19.4019	2	7	14	Allmendinger	Site 20
1821	108.6	-70.1389	-19.4018	2	7	14	Allmendinger	Site 20
1822	317.646	-70.1389	-19.4018	2	7	14	Allmendinger	Site 20
1823	139.452	-70.1389	-19.4017	2	7	14	Allmendinger	Site 20
1824	120.86	-70.1386	-19.4015	2	7	14	Allmendinger	Site 20
1825	346.341	-70.1387	-19.4014	2	7	14	Allmendinger	Site 20
1826	136.119	-70.1389	-19.4014	2	7	14	Allmendinger	Site 20
1827	108.213	-70.1389	-19.4014	2	7	14	Allmendinger	Site 20
1828	80.0589	-70.1408	-19.4016	2	7	14	Allmendinger	Site 20
1829	62.1415	-70.1404	-19.4019	2	7	14	Allmendinger	Site 20
1830	59.3344	-70.1403	-19.4019	2	7	14	Allmendinger	Site 20
1831	282.731	-70.1399	-19.4021	2	7	14	Allmendinger	Site 20
1832	122.847	-70.1395	-19.4021	2	7	14	Allmendinger	Site 20
1833	278.233	-70.1393	-19.4017	2	7	14	Allmendinger	Site 20
1834	107.501	-70.1393	-19.4016	2	7	14	Allmendinger	Site 20
1835	310.998	-70.1393	-19.4016	2	7	14	Allmendinger	Site 20
1836	123.719	-70.1393	-19.4014	2	7	14	Allmendinger	Site 20
1837	107.989	-70.1398	-19.4015	2	7	14	Allmendinger	Site 20
1838	258.517	-70.1399	-19.4015	2	7	14	Allmendinger	Site 20
1839	323.927	-70.1401	-19.4014	2	7	14	Allmendinger	Site 20
1840	313.588	-70.1402	-19.4014	2	7	14	Allmendinger	Site 20
1841	114.395	-70.1402	-19.4014	2	7	14	Allmendinger	Site 20
1842	92.7417	-70.1407	-19.4009	2	7	14	Allmendinger	Site 20
1843	318.474	-70.1406	-19.4011	2	7	14	Allmendinger	Site 20
1844	330.131	-70.1405	-19.4012	2	7	14	Allmendinger	Site 20
1845	132.5	-70.1405	-19.4017	2	7	14	Allmendinger	Site 20
1846	72.9269	-70.1407	-19.4017	2	7	14	Allmendinger	Site 20
1847	295.824	-70.1408	-19.4017	2	7	14	Allmendinger	Site 20
1848	214.022	-70.1433	-19.4041	2	7	14	Allmendinger	Site 20
1849	185.96	-70.143	-19.4153	2	7	14	Allmendinger	Site 19; Very slight opening. Elsewhere we would not have bothered with this one but today are desperate!
1850	44.1428	-70.1531	-19.4102	2	7	14	Allmendinger	Site 18
1851	131.086	-70.1531	-19.4102	2	7	14	Allmendinger	Site 18
1852	28.5824	-70.1534	-19.4102	2	7	14	Allmendinger	Site 18
1853	328.628	-70.1541	-19.4104	2	7	14	Allmendinger	Site 18
1854	13.1169	-70.1541	-19.4104	2	7	14	Allmendinger	Site 18
1855	269.898	-70.1541	-19.4104	2	7	14	Allmendinger	Site 18
1856	15.9965	-70.1541	-19.4104	2	7	14	Allmendinger	Site 18
1857	9.28617	-70.1541	-19.4104	2	7	14	Allmendinger	Site 18
1858	217.501	-70.1541	-19.4104	2	7	14	Allmendinger	Site 18
1859	20.2858	-70.1541	-19.4106	2	7	14	Allmendinger	Site 18
1860	85.448	-70.1541	-19.4105	2	7	14	Allmendinger	Site 18
1861	13.6248	-70.1541	-19.4105	2	7	14	Allmendinger	Site 18
1862	61.8021	-70.154	-19.4105	2	7	14	Allmendinger	Site 18
1863	250.63	-70.1539	-19.4105	2	7	14	Allmendinger	Site 18
1864	24.1959	-70.1537	-19.4107	2	7	14	Allmendinger	Site 18
1865	359.267	-70.1535	-19.4107	2	7	14	Allmendinger	Site 18
1866	8.37476	-70.1535	-19.4107	2	7	14	Allmendinger	Site 18
1867	9.59618	-70.1517	-19.4106	2	7	14	Allmendinger	Site 18
1868	4	-70.1765	-19.4019	2	7	14	Allmendinger	Site 17
1869	25.9363	-70.1759	-19.4017	2	7	14	Allmendinger	Site 17
1870	101.723	-70.1726	-19.4044	2	7	14	Allmendinger	Site 17
1871	63.8333	-70.1723	-19.4042	2	7	14	Allmendinger	Site 17
1872	218.202	-70.1722	-19.4042	2	7	14	Allmendinger	Site 17
1873	306.423	-70.1722	-19.4041	2	7	14	Allmendinger	Site 17
1874	78.8792	-70.1722	-19.4041	2	7	14	Allmendinger	Site 17
1875	44.3686	-70.1721	-19.404	2	7	14	Allmendinger	Site 17
1876	33.1549	-70.1719	-19.4038	2	7	14	Allmendinger	Site 17
1877	103.598	-70.1706	-19.4033	2	7	14	Allmendinger	Site 17
1878	101.243	-70.1706	-19.4033	2	7	14	Allmendinger	Site 17
1879	121.873	-70.1712	-19.4034	2	7	14	Allmendinger	Site 17
1880	125.103	-70.1712	-19.4034	2	7	14	Allmendinger	Site 17
1881	100.067	-70.1714	-19.4028	2	7	14	Allmendinger	Site 17; Close to scarp edge
1882	105.676	-70.1714	-19.4029	2	7	14	Allmendinger	Site 17; Close to scarp edge
1883	95.8452	-70.1714	-19.4029	2	7	14	Allmendinger	Site 17
1884	106.034	-70.1715	-19.4029	2	7	14	Allmendinger	Site 17; Close to scarp edge
1885	115.077	-70.1715	-19.403	2	7	14	Allmendinger	Site 17; Close to scarp edge
1886	114.745	-70.1715	-19.403	2	7	14	Allmendinger	Site 17; Close to scarp edge
1887	289.333	-70.1717	-19.4031	2	7	14	Allmendinger	Site 17
1888	22.789	-70.1717	-19.4031	2	7	14	Allmendinger	Site 17
1889	20.116	-70.1719	-19.4034	2	7	14	Allmendinger	Site 17
1890	222.346	-70.1719	-19.4034	2	7	14	Allmendinger	Site 17
1891	16.5712	-70.172	-19.4034	2	7	14	Allmendinger	Site 17
1892	234.012	-70.1721	-19.4035	2	7	14	Allmendinger	Site 17; Scarp parallel crack
1893	34.5951	-70.1723	-19.4036	2	7	14	Allmendinger	Site 17; Scarp parallel crack
1894	326.457	-70.1723	-19.4035	2	7	14	Allmendinger	Site 17
1895	125.176	-70.1724	-19.4034	2	7	14	Allmendinger	Site 17
1896	117.365	-70.1725	-19.4034	2	7	14	Allmendinger	Site 17
1897	133.637	-70.1725	-19.4034	2	7	14	Allmendinger	Site 17
1898	217.159	-70.1726	-19.4034	2	7	14	Allmendinger	Site 17; Scarp parallel crack
1899	296.872	-70.1727	-19.4032	2	7	14	Allmendinger	Site 17
1900	110.834	-70.1732	-19.4033	2	7	14	Allmendinger	Site 17
1901	112.019	-70.1732	-19.4033	2	7	14	Allmendinger	Site 17
1902	232.089	-70.1732	-19.4033	2	7	14	Allmendinger	Site 17; Scarp parallel crack
1903	266.295	-70.1732	-19.4033	2	7	14	Allmendinger	Site 17
1904	109.781	-70.1732	-19.4033	2	7	14	Allmendinger	Site 17
1905	68.7798	-70.1732	-19.4033	2	7	14	Allmendinger	Site 17; Scarp parallel crack
1906	101.815	-70.1732	-19.4033	2	7	14	Allmendinger	Site 17
1907	39.0096	-70.1732	-19.4033	2	7	14	Allmendinger	Site 17; Scarp parallel crack
1908	146.156	-70.1732	-19.4034	2	7	14	Allmendinger	Site 17
1909	329.132	-70.1733	-19.4034	2	7	14	Allmendinger	Site 17
1910	342.567	-70.1733	-19.4035	2	7	14	Allmendinger	Site 17
1911	54.6432	-70.1735	-19.4037	2	7	14	Allmendinger	Site 17; Scarp parallel crack
1912	21.8246	-70.1736	-19.4037	2	7	14	Allmendinger	Site 17; Scarp parallel crack
1913	32.148	-70.1739	-19.4043	2	7	14	Allmendinger	Site 17; Scarp parallel crack
1914	160.092	-70.2432	-19.2463	1	7	14	Allmendinger	Site 16
1915	7.92657	-70.2432	-19.2464	1	7	14	Allmendinger	Site 16
1916	347.992	-70.243	-19.2465	1	7	14	Allmendinger	Site 16
1917	133.345	-70.2431	-19.2466	1	7	14	Allmendinger	Site 16
1918	308.897	-70.2433	-19.2467	1	7	14	Allmendinger	Site 16
1919	151.468	-70.2433	-19.2467	1	7	14	Allmendinger	Site 16
1920	54.2244	-70.2436	-19.2466	1	7	14	Allmendinger	Site 16
1921	161.834	-70.2436	-19.2464	1	7	14	Allmendinger	Site 16
1922	167.207	-70.2437	-19.2463	1	7	14	Allmendinger	Site 16
1923	113.591	-70.2438	-19.2462	1	7	14	Allmendinger	Site 16
1924	6.16104	-70.2438	-19.2458	1	7	14	Allmendinger	Site 16
1925	20.7859	-70.2439	-19.2458	1	7	14	Allmendinger	Site 16
1926	20.3778	-70.244	-19.2459	1	7	14	Allmendinger	Site 16
1927	13.7247	-70.2439	-19.2459	1	7	14	Allmendinger	Site 16
1928	341.788	-70.2439	-19.246	1	7	14	Allmendinger	Site 16
1929	359.261	-70.2439	-19.246	1	7	14	Allmendinger	Site 16
1930	45.734	-70.2437	-19.2461	1	7	14	Allmendinger	Site 16
1931	179.85	-70.2437	-19.2462	1	7	14	Allmendinger	Site 16
1932	28.673	-70.2425	-19.2461	1	7	14	Allmendinger	Site 16
1933	123.252	-70.2425	-19.2468	1	7	14	Allmendinger	Site 16
1934	120.294	-70.2425	-19.2468	1	7	14	Allmendinger	Site 16
1935	158.919	-70.2425	-19.2468	1	7	14	Allmendinger	Site 16
1936	358.75	-70.2425	-19.2468	1	7	14	Allmendinger	Site 16
1937	128.374	-70.243	-19.2467	1	7	14	Allmendinger	Site 16
1938	74.603	-70.2481	-19.2519	1	7	14	Allmendinger	Site 15
1939	333.306	-70.2481	-19.2519	1	7	14	Allmendinger	Site 15
1940	65.8	-70.2481	-19.2519	1	7	14	Allmendinger	Site 15
1941	316.457	-70.2475	-19.252	1	7	14	Allmendinger	Site 15
1942	165.9	-70.2468	-19.2515	1	7	14	Allmendinger	Site 15
1943	177.094	-70.2468	-19.2515	1	7	14	Allmendinger	Site 15
1944	150.588	-70.247	-19.2516	1	7	14	Allmendinger	Site 15
1945	338.3	-70.247	-19.2517	1	7	14	Allmendinger	Site 15
1946	178.447	-70.2471	-19.2517	1	7	14	Allmendinger	Site 15
1947	0.198807	-70.2471	-19.2517	1	7	14	Allmendinger	Site 15
1948	327.1	-70.2473	-19.2518	1	7	14	Allmendinger	Site 15
1949	340.494	-70.2475	-19.2518	1	7	14	Allmendinger	Site 15
1950	20.1304	-70.2477	-19.2518	1	7	14	Allmendinger	Site 15
1951	344.158	-70.2477	-19.2518	1	7	14	Allmendinger	Site 15
1952	27.2981	-70.2477	-19.2518	1	7	14	Allmendinger	Site 15; Parallel slope contour
1953	12.162	-70.2477	-19.2517	1	7	14	Allmendinger	Site 15
1954	9.80052	-70.2478	-19.2517	1	7	14	Allmendinger	Site 15
1955	2.2279	-70.2478	-19.2517	1	7	14	Allmendinger	Site 15
1956	147.785	-70.2481	-19.2513	1	7	14	Allmendinger	Site 15
1957	136.274	-70.2481	-19.2513	1	7	14	Allmendinger	Site 15
1958	160.696	-70.2481	-19.2513	1	7	14	Allmendinger	Site 15
1959	27.3278	-70.2482	-19.2514	1	7	14	Allmendinger	Site 15
1960	150.011	-70.2481	-19.2514	1	7	14	Allmendinger	Site 15
1961	152.982	-70.2481	-19.2514	1	7	14	Allmendinger	Site 15
1962	120.768	-70.248	-19.2516	1	7	14	Allmendinger	Site 15
1963	178.715	-70.2479	-19.2516	1	7	14	Allmendinger	Site 15
1964	134.273	-70.2478	-19.2517	1	7	14	Allmendinger	Site 15
1965	156.615	-70.2479	-19.2517	1	7	14	Allmendinger	Site 15
1966	349.097	-70.2479	-19.2518	1	7	14	Allmendinger	Site 15
1967	65.5883	-70.248	-19.2518	1	7	14	Allmendinger	Site 15
1968	154.388	-70.248	-19.2518	1	7	14	Allmendinger	Site 15
1969	98.3215	-70.2481	-19.2519	1	7	14	Allmendinger	Site 15
1970	153.64	-70.2481	-19.2518	1	7	14	Allmendinger	Site 15
1971	346.033	-70.2481	-19.2518	1	7	14	Allmendinger	Site 15
1972	345.273	-70.2481	-19.2518	1	7	14	Allmendinger	Site 15
1973	346.18	-70.2481	-19.2518	1	7	14	Allmendinger	Site 15
1974	354.224	-70.2482	-19.2518	1	7	14	Allmendinger	Site 15
1975	5.52101	-70.2482	-19.2518	1	7	14	Allmendinger	Site 15
1976	5.26208	-70.2483	-19.2518	1	7	14	Allmendinger	Site 15
1977	148.391	-70.2483	-19.2517	1	7	14	Allmendinger	Site 15
1978	28.1837	-70.2485	-19.2517	1	7	14	Allmendinger	Site 15
1979	359.07	-70.2488	-19.2521	1	7	14	Allmendinger	Site 15
1980	357.171	-70.2488	-19.2521	1	7	14	Allmendinger	Site 15
1981	357.363	-70.2487	-19.2521	1	7	14	Allmendinger	Site 15
1982	351.344	-70.2487	-19.2521	1	7	14	Allmendinger	Site 15
1983	347.156	-70.2487	-19.2521	1	7	14	Allmendinger	Site 15
1984	333.557	-70.2486	-19.252	1	7	14	Allmendinger	Site 15
1985	340.797	-70.2486	-19.252	1	7	14	Allmendinger	Site 15
1986	323.216	-70.2486	-19.252	1	7	14	Allmendinger	Site 15
1987	148.541	-70.2486	-19.252	1	7	14	Allmendinger	Site 15
1988	160.349	-70.2485	-19.252	1	7	14	Allmendinger	Site 15
1989	348.396	-70.2485	-19.252	1	7	14	Allmendinger	Site 15
1990	48.4472	-70.2485	-19.2519	1	7	14	Allmendinger	Site 15
1991	151.739	-70.2484	-19.2519	1	7	14	Allmendinger	Site 15
1992	270.56	-70.2484	-19.2518	1	7	14	Allmendinger	Site 15
1993	139.165	-70.2485	-19.2519	1	7	14	Allmendinger	Site 15
1994	355.074	-70.2485	-19.2517	1	7	14	Allmendinger	Site 15
1995	143.993	-70.2484	-19.2517	1	7	14	Allmendinger	Site 15
1996	140.424	-70.2484	-19.2517	1	7	14	Allmendinger	Site 15
1997	220.609	-70.0848	-19.2742	1	7	14	Allmendinger	Site 14
1998	171.287	-70.0848	-19.2742	1	7	14	Allmendinger	Site 14
1999	208.089	-70.0848	-19.2741	1	7	14	Allmendinger	Site 14
[truncated: 1,723 more rows]

## Sheet: Site Means
Site	Longitude	Latitude	Day	Month	Year	N	Site Mean	1σ	2σ	Circ. Var	Kappa	Notes
6a	-70.0891	-19.0637	29	6	2014	21	41	5.1	9.996	0.0773	6.5394	does not incl. Scott's data (still learning how to collect data with the phone)
6b	-70.0891	-19.0637	29	6	2014	23	102	5.2	10.192	0.0883	5.8522
7	-70.0929	-19.0687	29	6	2014	34	5.5	3.7	7.252	0.0662	7.4257
12	-70.1078	-19.0728	30	6	2014	40	27.7	5.9	11.564	0.191	2.8713
10	-70.2026	-19.0943	30	6	2014	46	76.6	15.1	29.596	0.6185	0.8225
8 & 9	-70.2452	-19.1082	30	6	2014	76	330.2	6	11.76	0.296	2.0136
11	-70.167	-19.1093	30	6	2014	31	96.9	9.8	19.208	0.3513	1.6913
16 & 17	-70.2432	-19.2463	1	7	2014	87	332.1	26.7	52.332	0.8363	0.3242
15	-70.2477	-19.2518	1	7	2014	86	347.7	7.7	15.092	0.48	1.2235
13 & 14a	-70.0848	-19.2739	30	6	2014	39	29.3	4.2	8.232	0.0983	5.3047
13 & 14b	-70.0848	-19.2739	30	6	2014	31	130.8	11.8	23.128	0.4377	1.3616
20	-70.1393	-19.4016	2	7	2014	87	106	6.1	11.956	0.3743	1.6004
18 & 19	-70.1541	-19.4104	2	7	2014	19	22	17.6	34.496	0.5084	1.1283
21	-70.1423	-19.4517	3	7	2014	30	347.4	7.6	14.896	0.2375	2.4549
22	-70.1189	-19.4887	3	7	2014	40	318.2	7.6	14.896	0.2983	2.0136
2b	-70.0744	-19.5498	14	5	2014	30	14.9	7.6	14.896	0.2305	2.4549
PI 01	-70.0118	-19.5567	4	7	2014	104	107.9	6.7	13.132	0.4529	1.2907
2a	-70.0121	-19.5667	14	5	2014	15	35.4	5.6	10.976	0.0648	7.4257
PI 02 & 03	-70.0261	-19.5696	4	7	2014	130	356.8	4.8	9.408	0.3573	1.6913
PI 04	-70.1066	-19.5984	4	7	2014	65	54.2	16.8	32.928	0.7044	0.6062
3a	-70.1667	-19.6265	14	5	2014	16	78.5	31.5	61.74	0.6834	0.6524
PI 7	-70.0755	-19.6582	5	7	2014	64	110.5	10.3	20.188	0.5314	1.0389
PI 6	-70.1149	-19.6686	5	7	2014	70	345.4	12.8	25.088	0.6312	0.7724
PI 05 & 3b	-70.1276	-19.6917	5	7	2014	99	350.9	6	11.76	0.3999	1.5157	Pisagua transect
4a	-70.1109	-19.7197	14	5	2014	50	359.2	10.8	21.168	0.5043	1.1283
PI 8 & pi 14	-70.089	-19.7205	5	7	2014	50	97.3	3.5	6.86	0.0831	5.8522
PI 10	-70.0724	-19.7518	5	7	2014	31	349.6	12.2	23.912	0.452	1.2907
PI 15	-70.038	-19.7519	6	7	2014	19	1.2	8.4	16.464	0.1827	3.0002
PI 11 & 13a	-70.0686	-19.7626	5	7	2014	96	348.3	4.6	9.016	0.2626	2.2142
PI 11 & 13b	-70.0686	-19.7626	5	7	2014	17	95.4	7.3	14.308	0.121	4.177
PI 12b	-70.0836	-19.7637	5	7	2014	29	59.7	5.8	11.368	0.1311	3.9107
PI 12a	-70.0836	-19.7637	5	7	2014	37	324.5	11	21.56	0.4481	1.3257
PI 16, 17, 18, 19	-70.013	-19.7813	6	7	2014	38	330.3	10.6	20.776	0.4301	1.3616
PI 20 & 21a	-69.9799	-19.8086	6	7	2014	20	82.5	8.6	16.856	0.2025	2.7538
PI 20 & 21b	-69.9799	-19.8086	6	7	2014	27	328.1	8	15.68	0.2335	2.4549
PI 28	-70.1023	-19.825	7	7	2014	40	10.9	8.8	17.248	0.3615	1.6451
PI 26	-70.0744	-19.8495	7	7	2014	71	120.8	9.8	19.208	0.5341	1.0389
PI 23	-70.015	-19.8714	6	7	2014	123	12.7	5.3	10.388	0.3812	1.5574
PI 24	-70.0343	-19.8733	6	7	2014	35	7.1	14	27.44	0.5383	1.0389
PI 22	-69.9966	-19.8782	6	7	2014	207	27	4.9	9.604	0.4637	1.2567
PI 27	-70.0768	-19.8965	7	7	2014	67	338.9	10.6	20.776	0.554	0.9821
PI 33	-69.9321	-19.8971	9	7	2014	32	123.9	4.4	8.624	0.0876	5.8522
PI 34	-69.9982	-19.9175	9	7	2014	72	347.1	7.2	14.112	0.407	1.4754
PI 35a	-70.0173	-19.9277	9	7	2014	39	120	5.5	10.78	0.1643	3.3011
PI 35b	-70.0173	-19.9277	9	7	2014	75	8.5	4.6	9.016	0.2142	2.6461
PI 31 & 1b	-69.8661	-19.9496	9	7	2014	76	344.2	15.5	30.38	0.7026	0.6062
1c	-69.9611	-19.9531	13	5	2014	32	345.7	10.6	20.776	0.3944	1.5157
1a & PI 30	-69.8038	-19.9653	9	7	2014	43	89.1	24	47.04	0.7433	0.5165
PI 36	-70.0363	-19.972	9	7	2014	70	17.6	4.4	8.624	0.1815	3.0002
PI 37	-70.01	-20.0117	10	7	2014	67	7.8	7	13.72	0.3721	1.6004
PI 38	-70.0195	-20.0218	10	7	2014	64	18.1	3.8	7.448	0.1294	4.177
1d	-70.076	-20.0222	13	5	2014	29	19.4	7	13.72	0.1988	2.8713	Caleta Buena Transect
PI 39a	-70.041	-20.0549	10	7	2014	26	13.9	4.3	8.428	0.0636	7.4257
PI 39a	-70.041	-20.0549	10	7	2014	35	323	6	11.76	0.1739	3.1426
PI 42a	-69.9317	-20.086	10	7	2014	28	21.5	5.9	11.564	0.131	3.9107
PI 42b	-69.9317	-20.086	10	7	2014	58	318.3	3.9	7.644	0.1225	4.177
PI 40a	-70.0219	-20.0869	10	7	2014	12	85.2	6.3	12.348	0.0631	7.4257
PI 40b	-70.0219	-20.0869	10	7	2014	27	339.8	6.8	13.328	0.17	3.1426
PI 41	-69.988	-20.0947	10	7	2014	61	102.4	9.4	18.424	0.4896	1.1911
PI 43	-69.9288	-20.1608	10	7	2014	37	102.4	11	21.56	0.4484	1.3257
5b	-70.0359	-20.1767	15	5	2014	36	90.6	6.1	11.956	0.185	3.0002
PI 50	-70.0222	-20.179	12	7	2014	24	339.8	5.3	10.388	0.0943	5.3047
5a-a	-70.0539	-20.1843	15	5	2014	32	47.1	5.1	9.996	0.1149	4.4888
5a-b	-70.0539	-20.1843	15	5	2014	19	130.8	8.4	16.464	0.1882	3.0002
PI 49	-69.9969	-20.286	11	7	2014	12	29.4	20.2	39.592	0.4664	1.2567
PI 47	-70.0569	-20.3482	11	7	2014	73	3.9	6.6	12.936	0.3637	1.6451
PI 48a	-70.099	-20.3666	11	7	2014	59	348.5	4	7.84	0.1301	3.9107
PI 48b	-70.099	-20.3666	11	7	2014	12	58	8.7	17.052	0.1296	4.177
PI 46a	-70.0417	-20.5076	11	7	2014	50	331.4	4.2	8.232	0.1248	4.177
PI 46a	-70.0417	-20.5076	11	7	2014	13	91.2	7.6	14.896	0.107	4.8589
PI 44	-70.0045	-20.5396	11	7	2014	92	323.7	4.1	8.036	0.2109	2.6461
PI 29	-70.126	-21.0404	8	7	2014	41	6.9	4.7	9.212	0.1212	4.177	Salar Grande transect
